# Supplementary material for: Synthesis, In Vitro and In Silico Anticancer Activity of New 4-Methylbenzamide Derivatives Containing 2,6-Substituted Purines as Potential Protein Kinases Inhibitors
Source: MDPI journal article supplement (doi:10.3390/ijms222312738), 2021-11-25

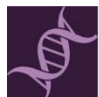

Article

# Synthesis, *In Vitro* and *In Silico* Anticancer Activity of New 4-Methylbenzamide Derivatives Containing 2,6-Substituted Purines as Potential Protein Kinases Inhibitors

Elena Kalinichenko <sup>1\*</sup>, Aliaksandr Faryna <sup>1</sup>, Tatyana Bozhok <sup>1</sup>, Alesya Panibrat <sup>1</sup>

<sup>1</sup> Institute of Bioorganic Chemistry, National Academy of Sciences of Belarus, BY-220141, 5/2 Academician V.F. Kuprevich Street, Minsk, Belarus; info@iboch.by

\* Correspondence: kalinichenko@iboch.by

**Spectral data**

$^1\text{H}$ ,  $^{13}\text{C}$  and  $^{19}\text{F}$  NMR spectra of compound 7 (DMSO- $d_6$ ),  
**4-((2,6-dichloro-9H-purin-9-yl)methyl)-N-(3-(trifluoromethyl)phenyl)benzamide:**

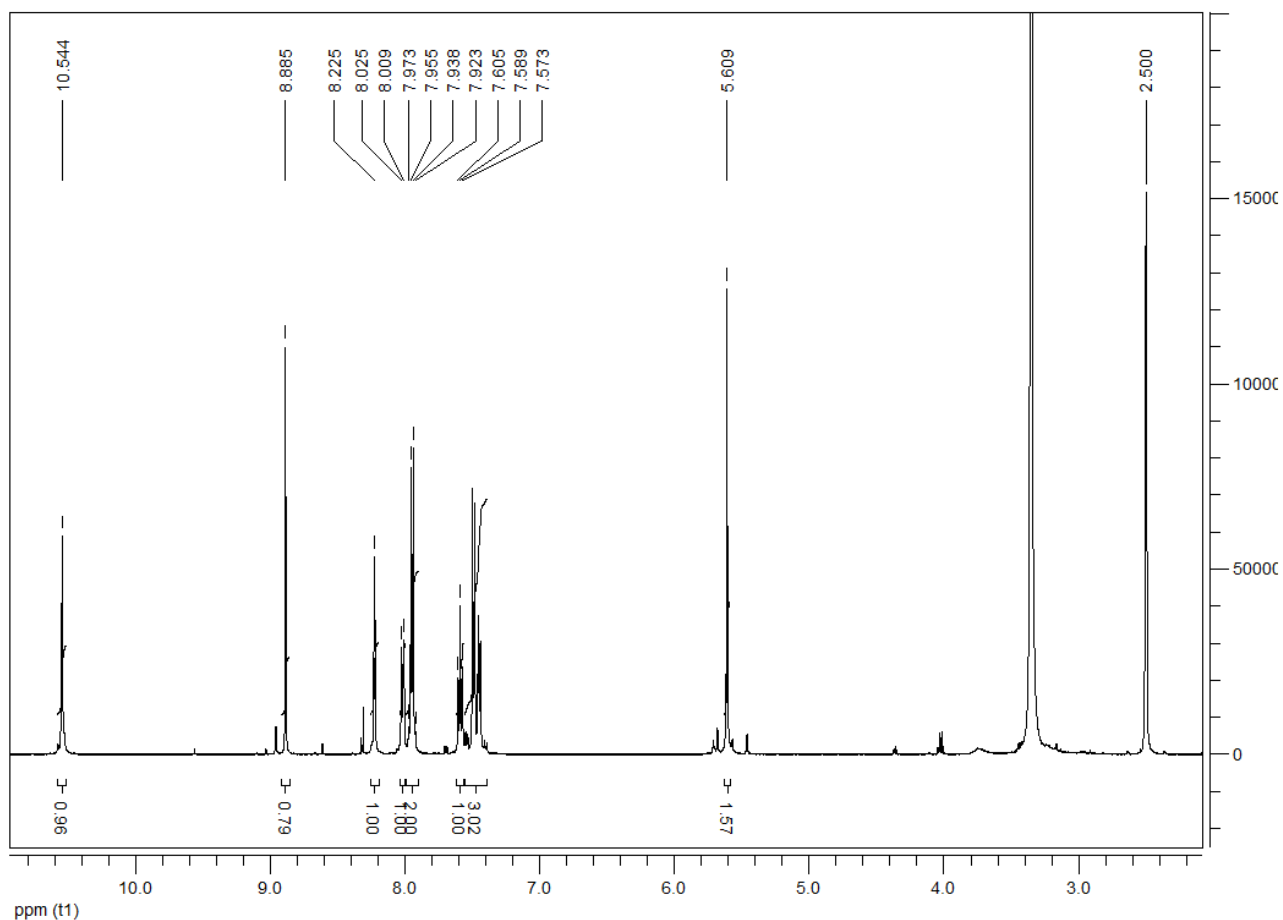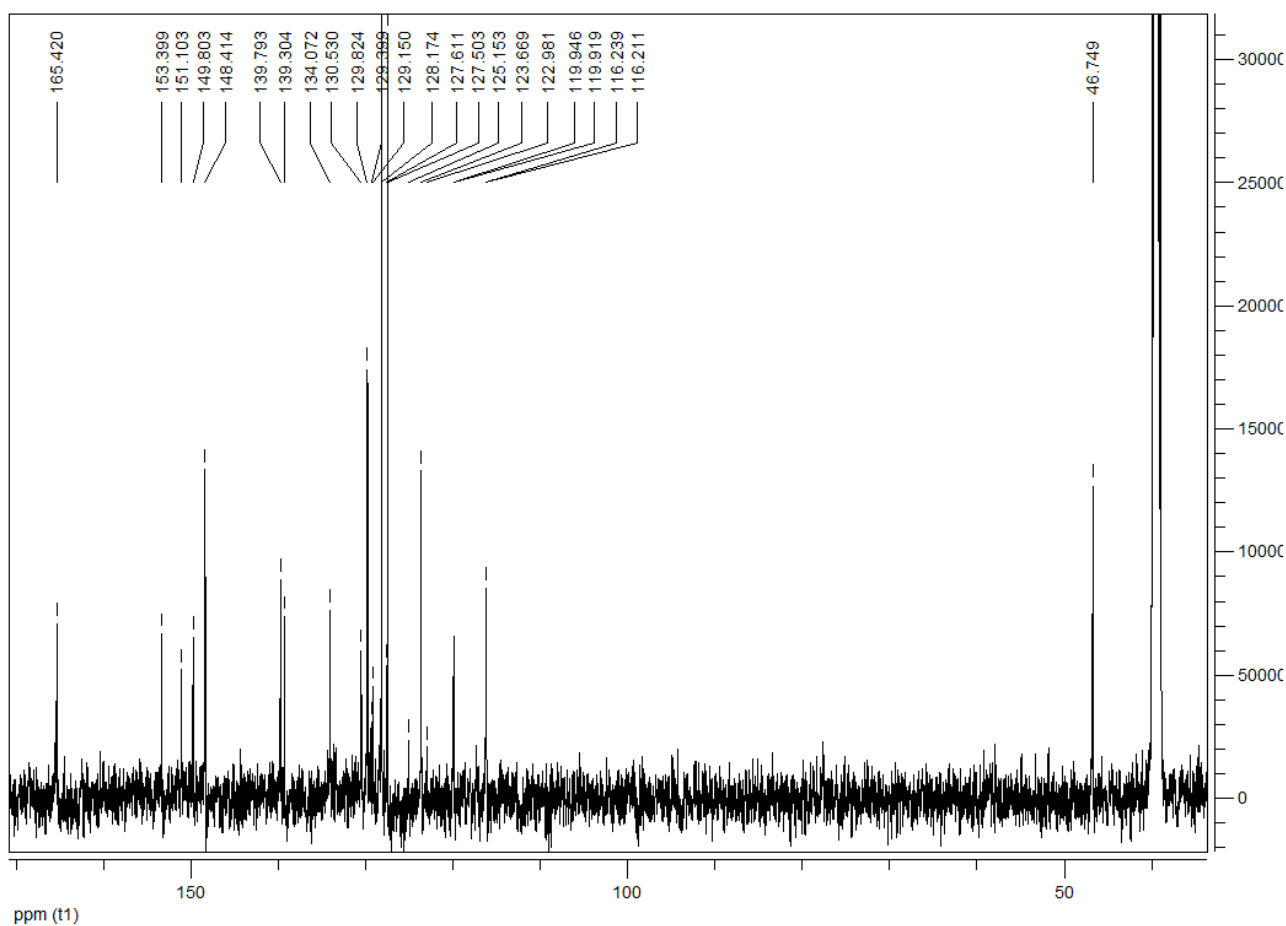

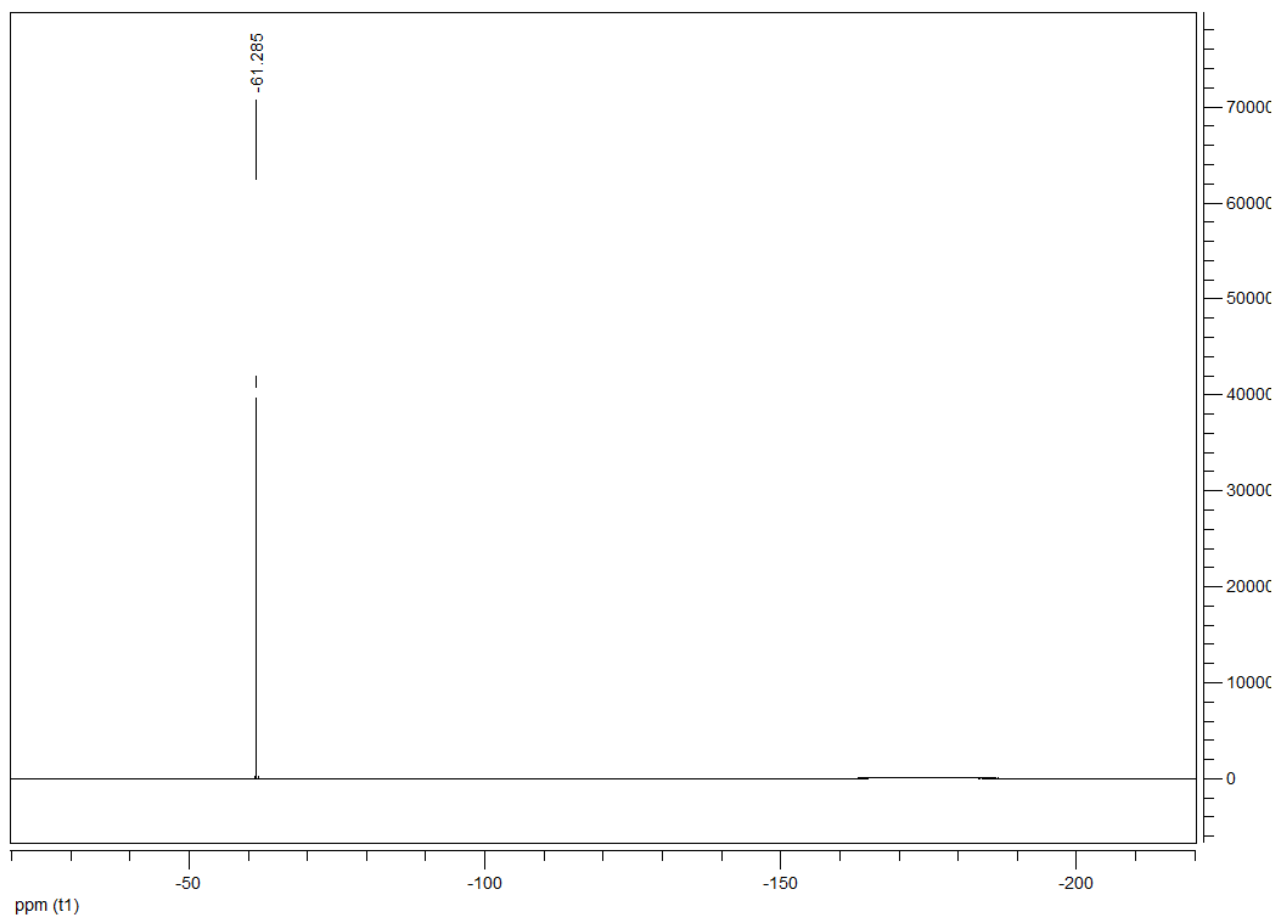

<sup>1</sup>H, <sup>13</sup>C and <sup>19</sup>F NMR spectra of compound 8 (DMSO-d<sub>6</sub>),  
**4-((6-amino-2-fluoro-9H-purin-9-yl)methyl)-N-(3-(trifluoromethyl)phenyl)benzamide:**

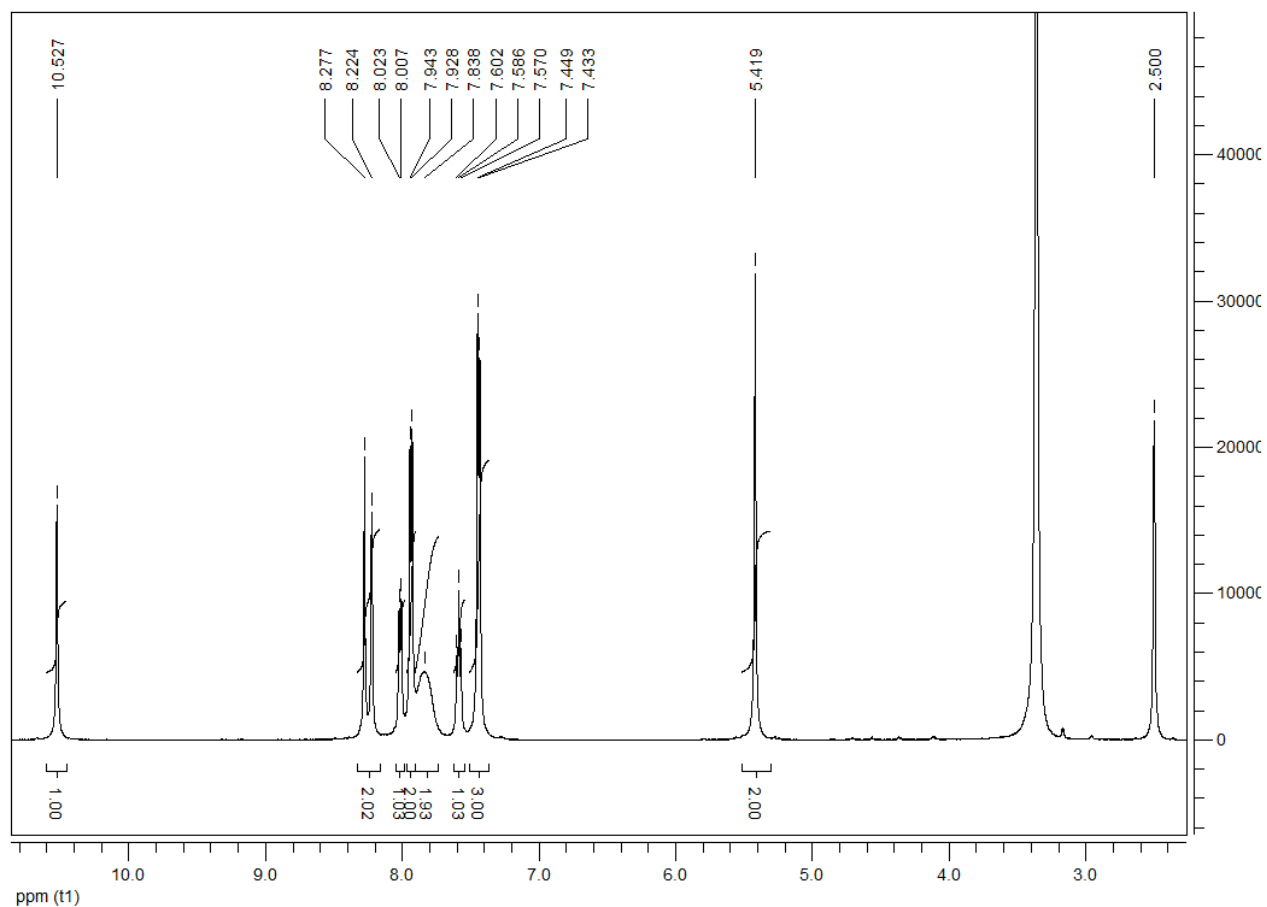

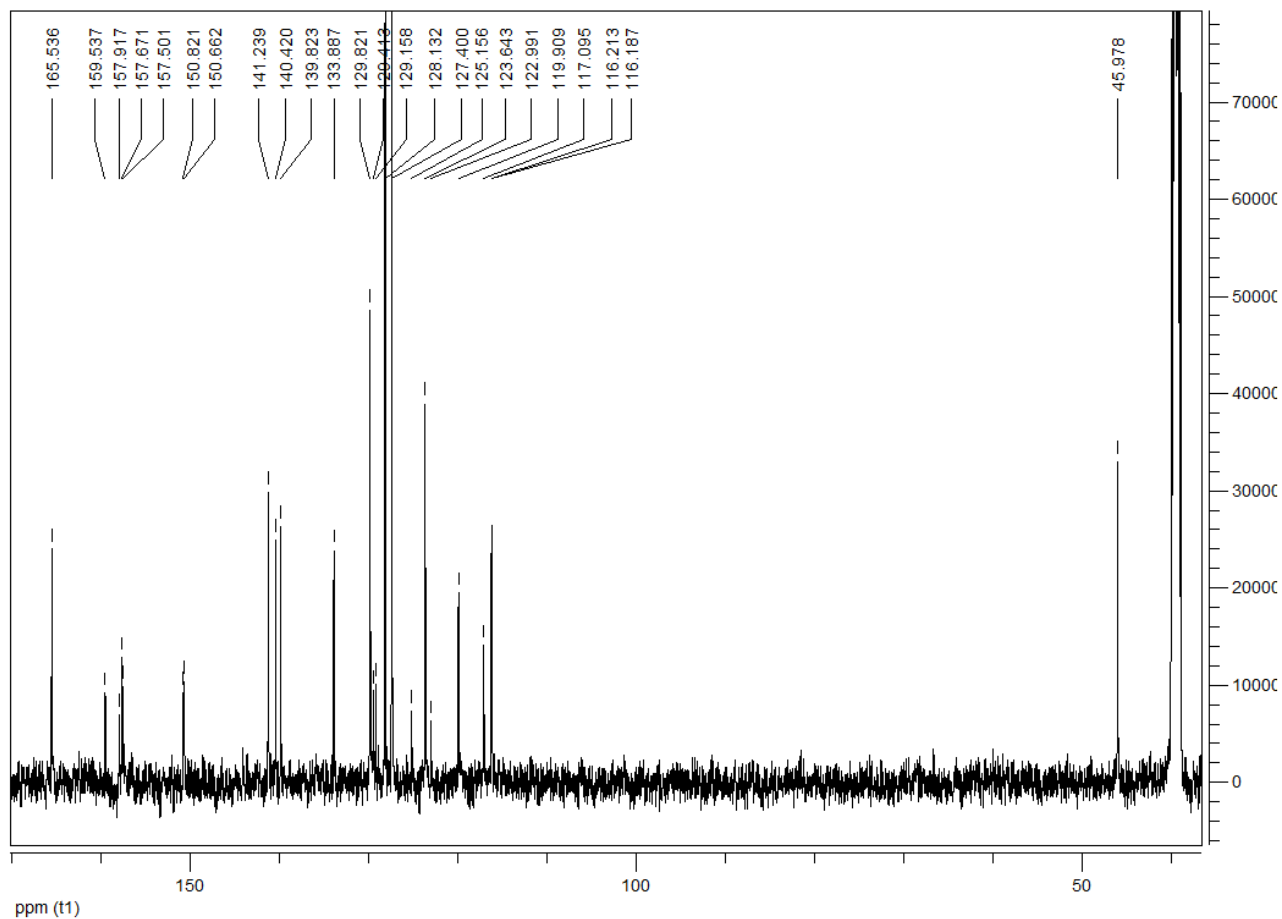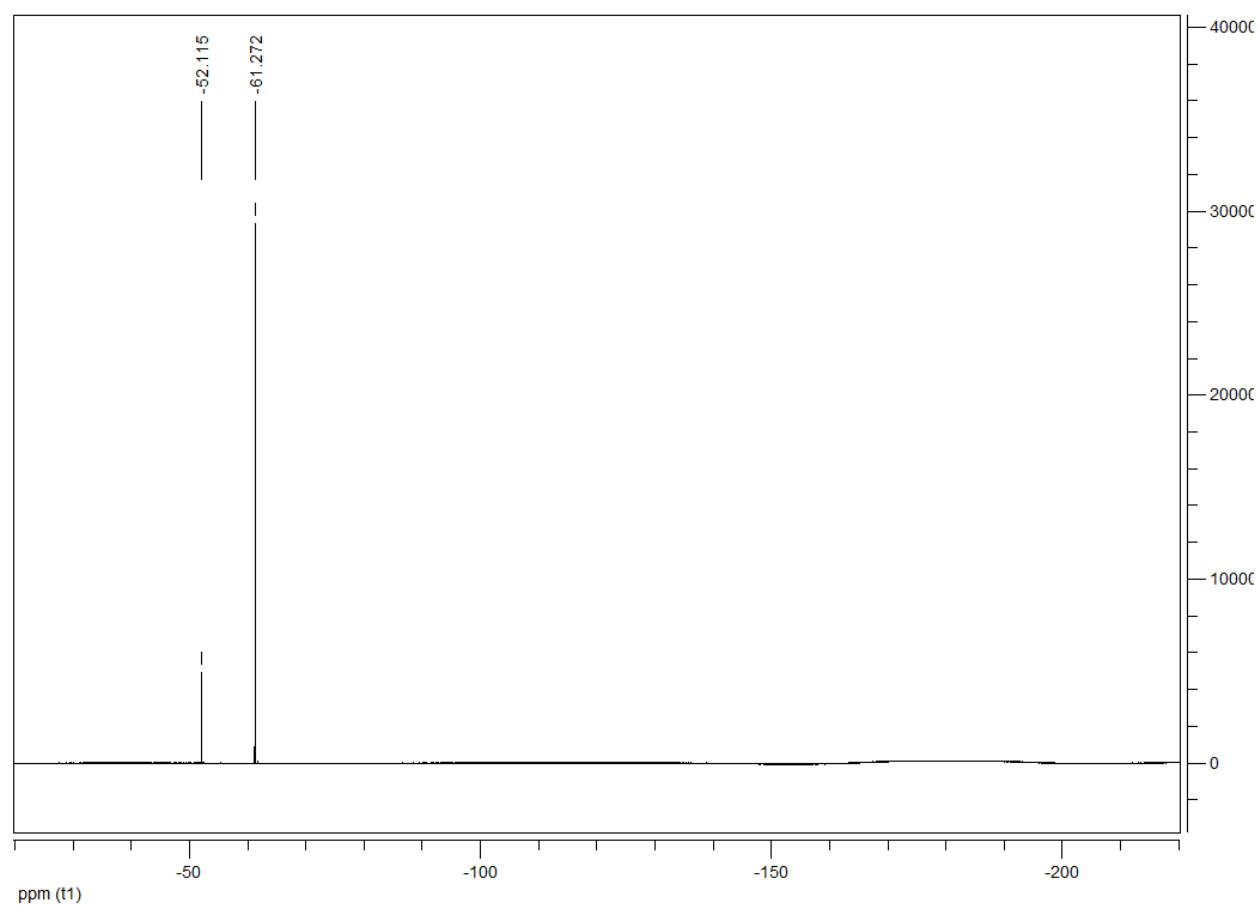

<sup>1</sup>H, <sup>13</sup>C and <sup>19</sup>F NMR spectra of compound **9** (DMSO-d<sub>6</sub>),  
**4-((6-amino-9H-purin-9-yl)methyl)-N-(3-(trifluoromethyl)phenyl)benzamide:**

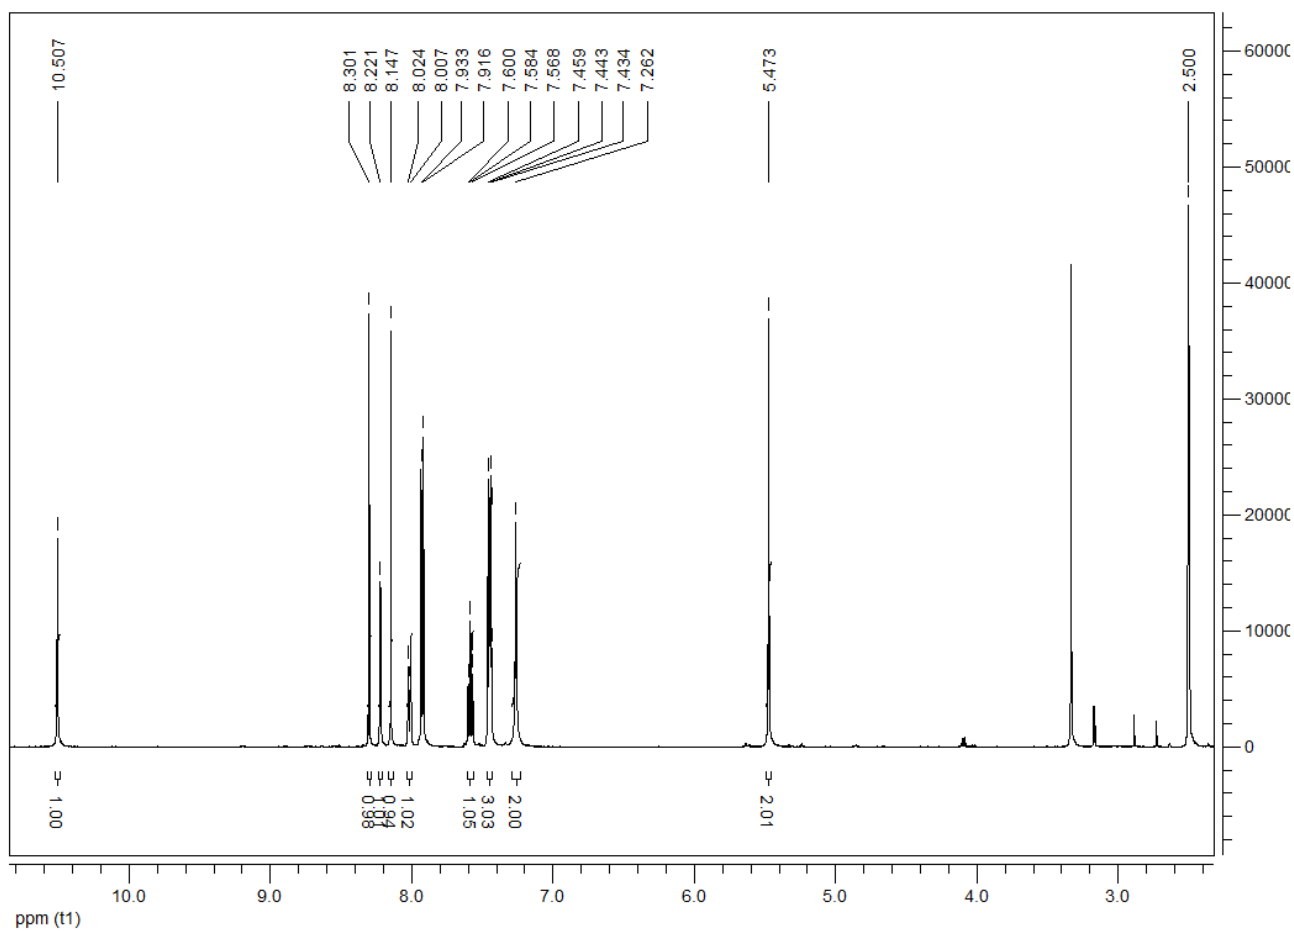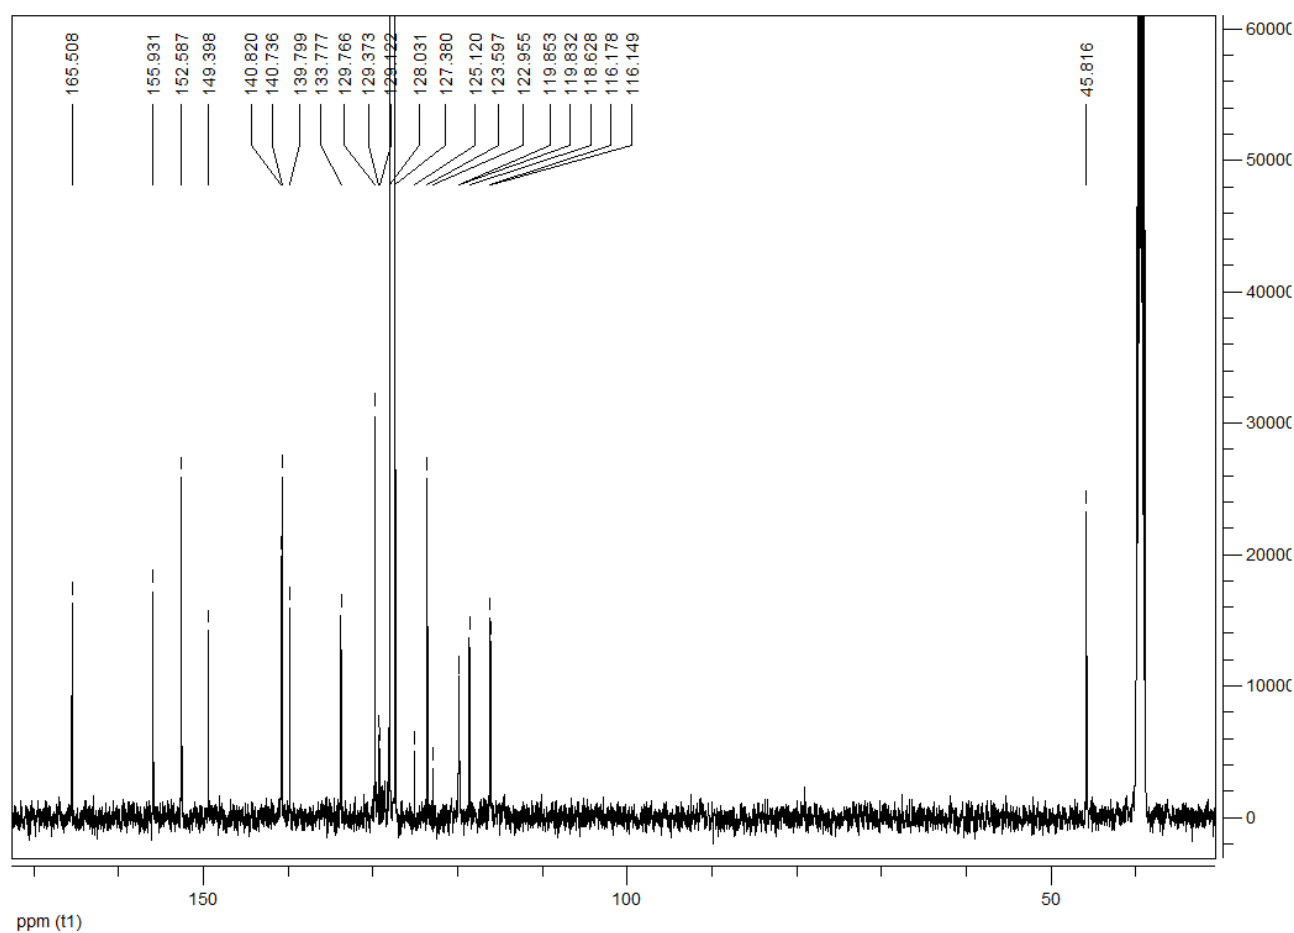

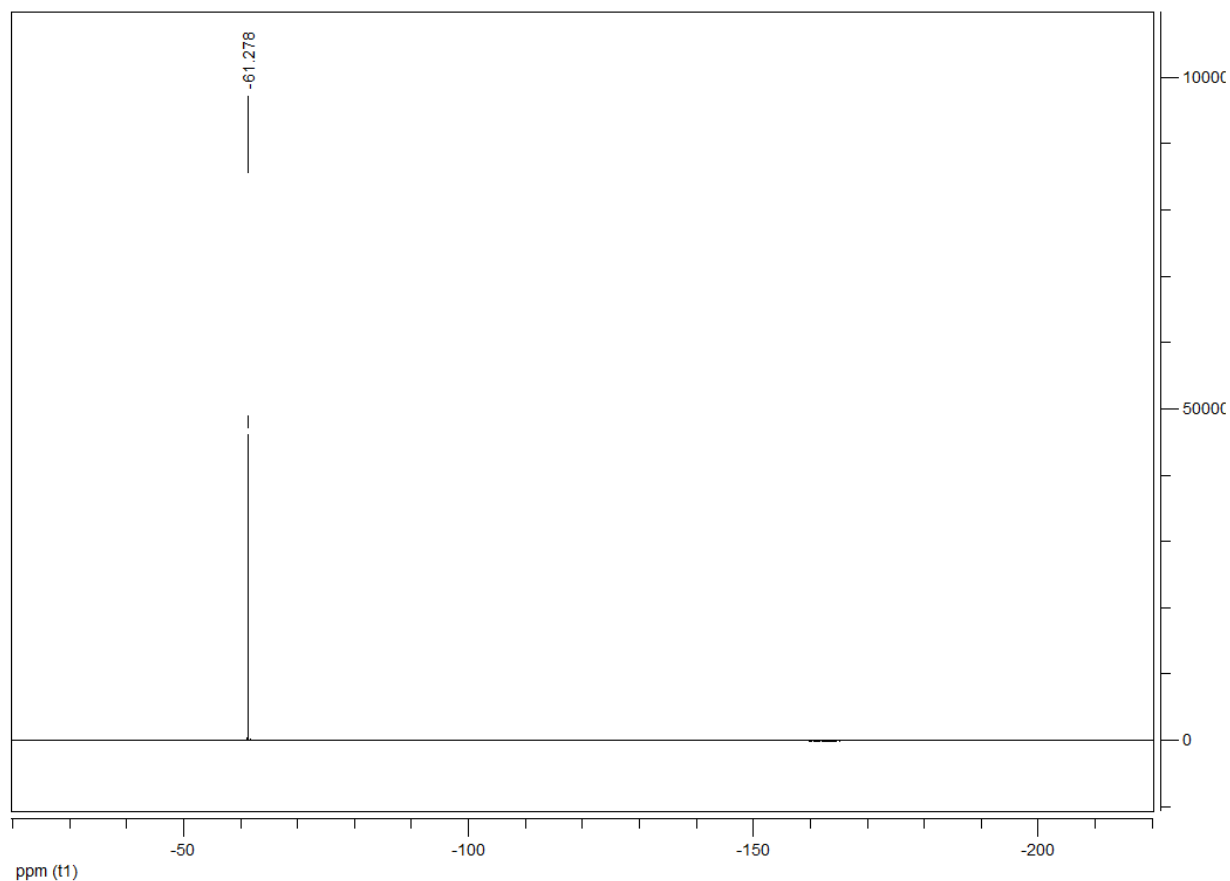

<sup>1</sup>H, <sup>13</sup>C and <sup>19</sup>F NMR spectra of compound 10 (DMSO-d<sub>6</sub>),  
**4-((2,6-dichloro-9H-purin-9-yl)methyl)-N-(3-(4-methyl-1H-imidazol-1-yl)-5-(trifluoromethyl)-phenyl)benzamide:**

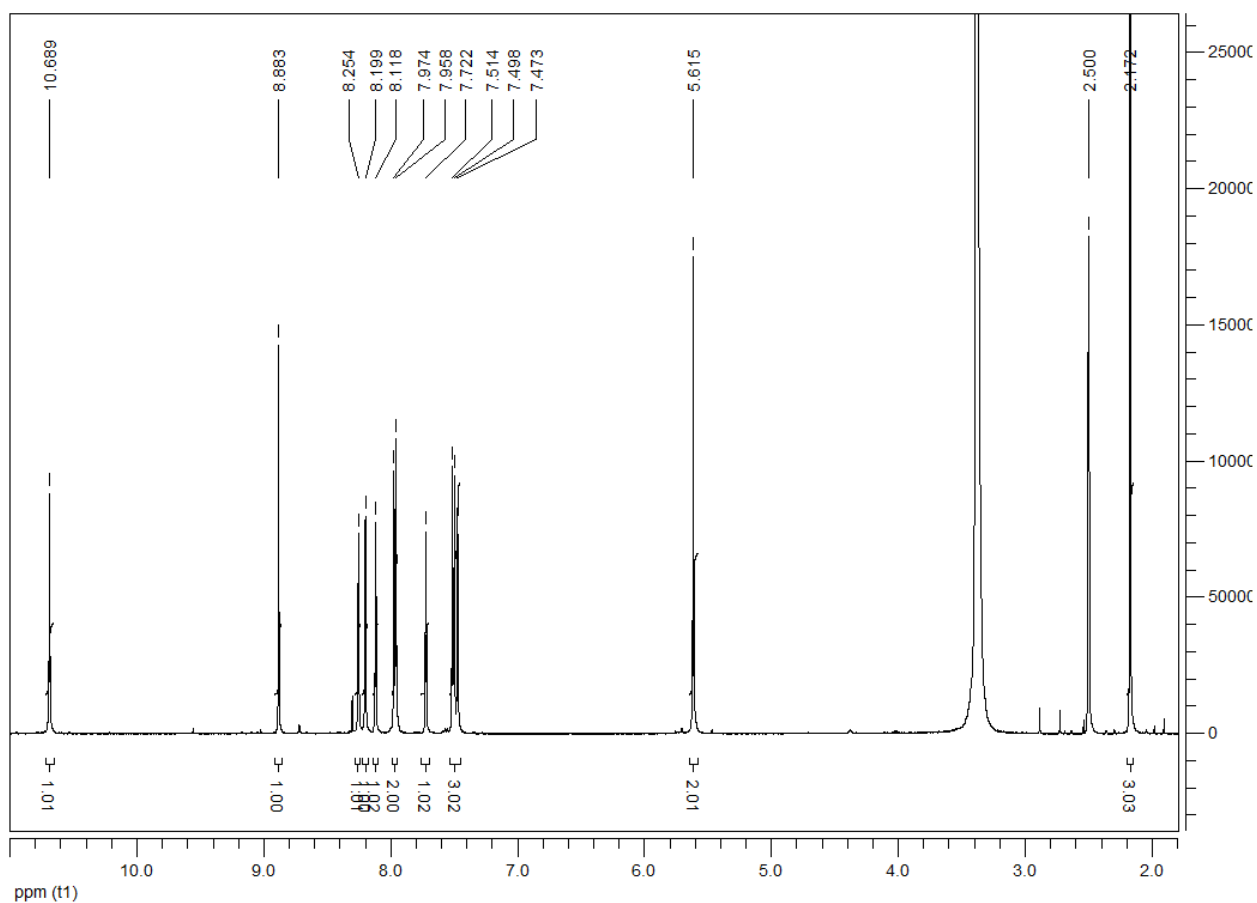

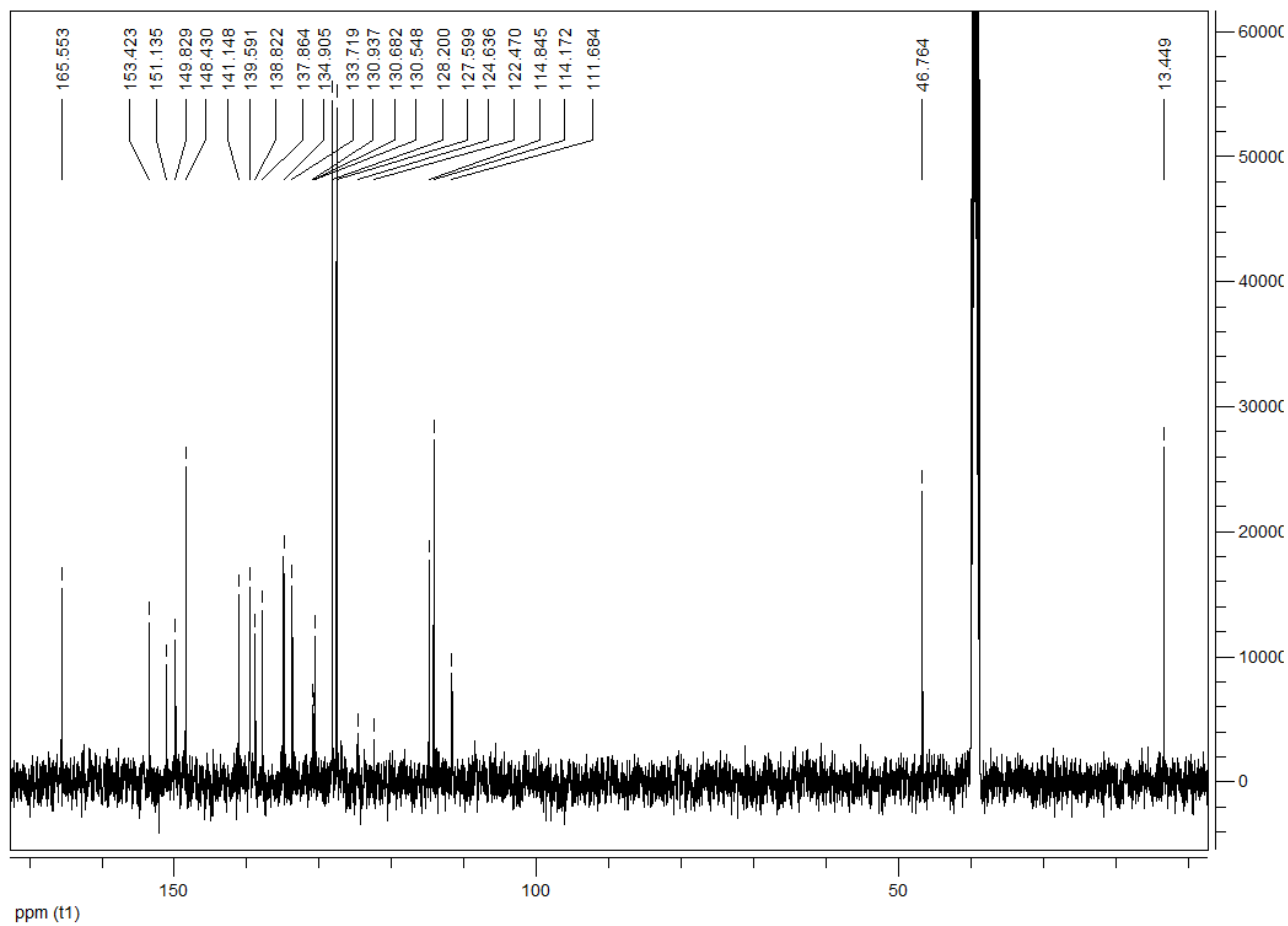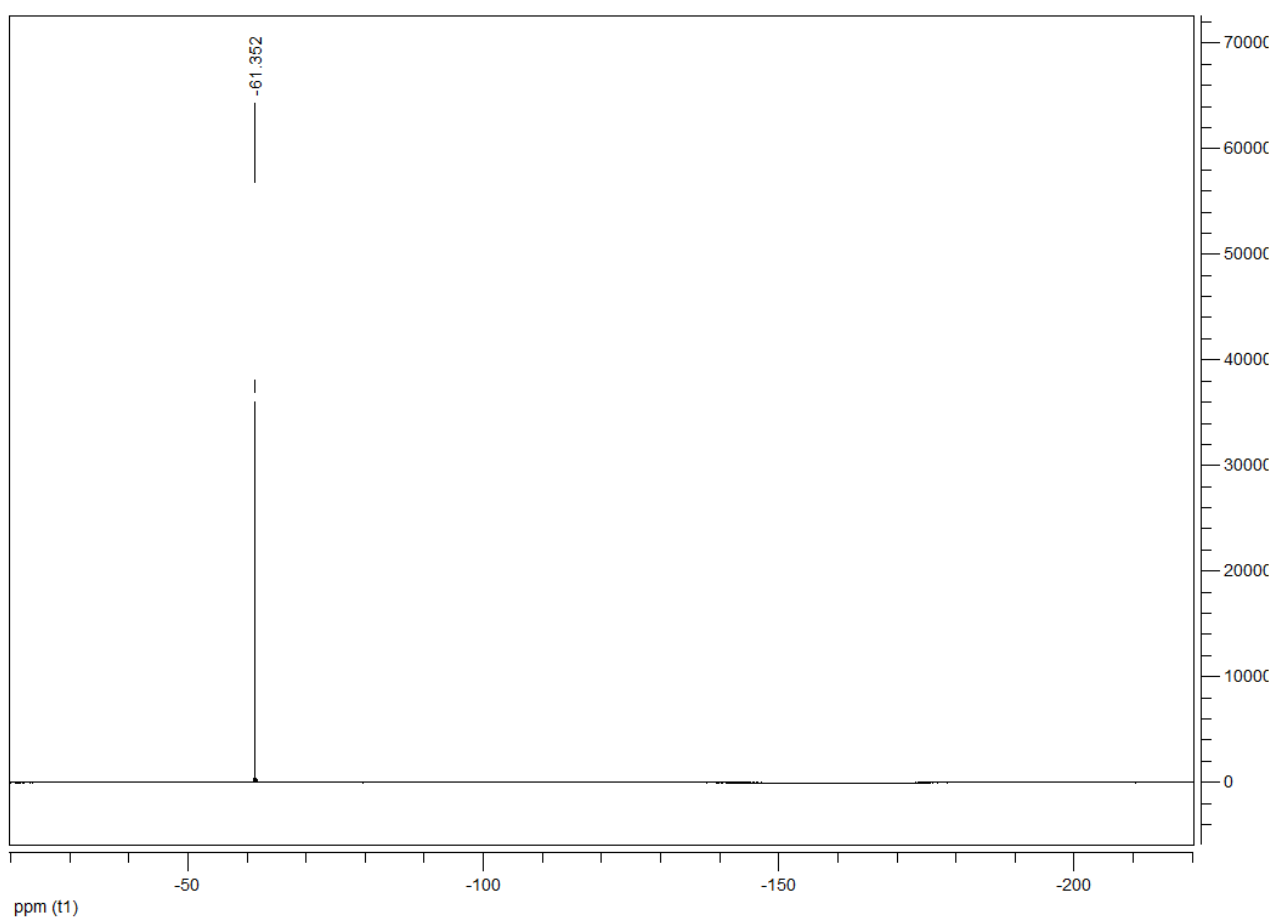

<sup>1</sup>H, <sup>13</sup>C and <sup>19</sup>F NMR spectra of compound **11** (DMSO-d<sub>6</sub>),  
**4-((6-amino-2-fluoro-9H-purin-9-yl)methyl)-N-(3-(4-methyl-1H-imidazol-1-yl)-5-(trifluoromethyl)phenyl)benzamide:**

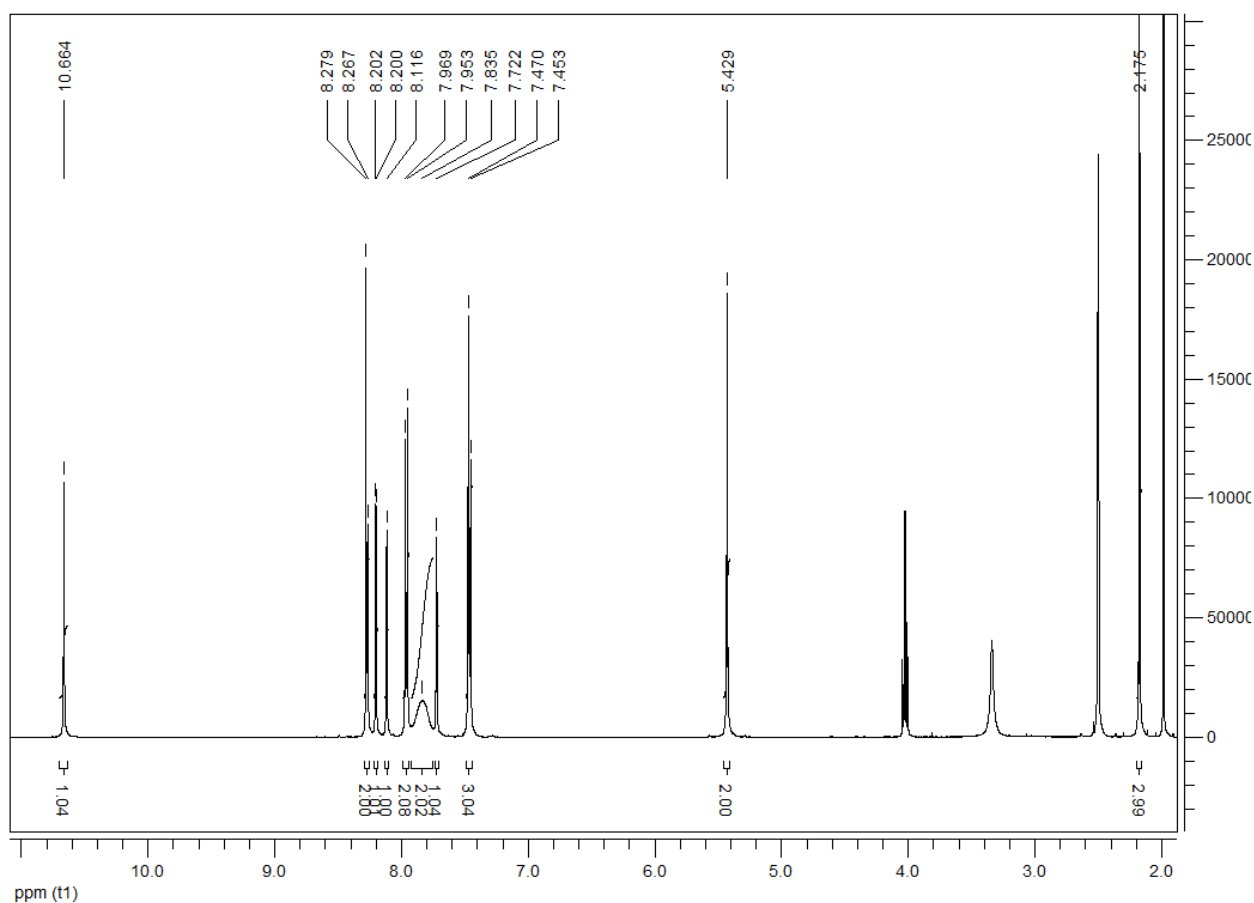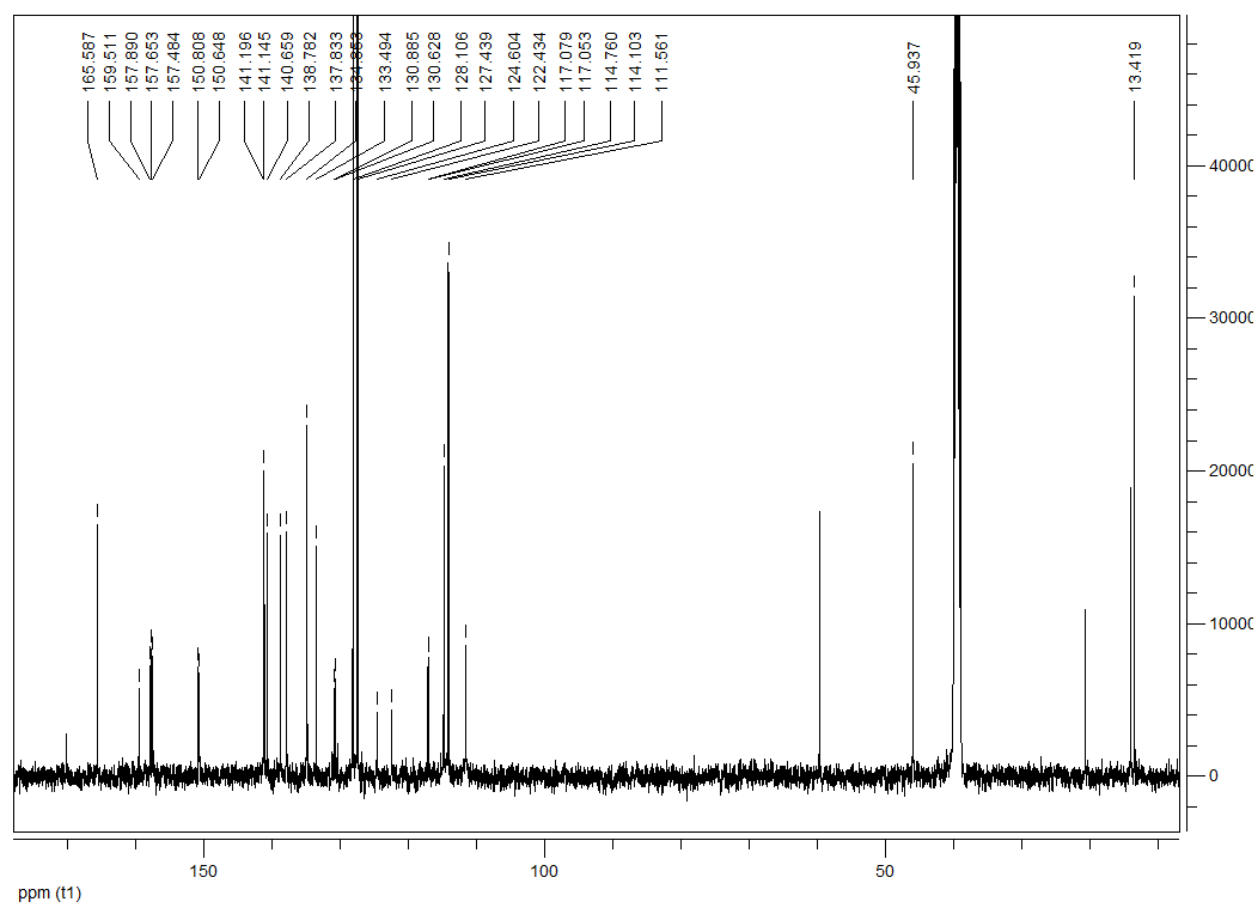



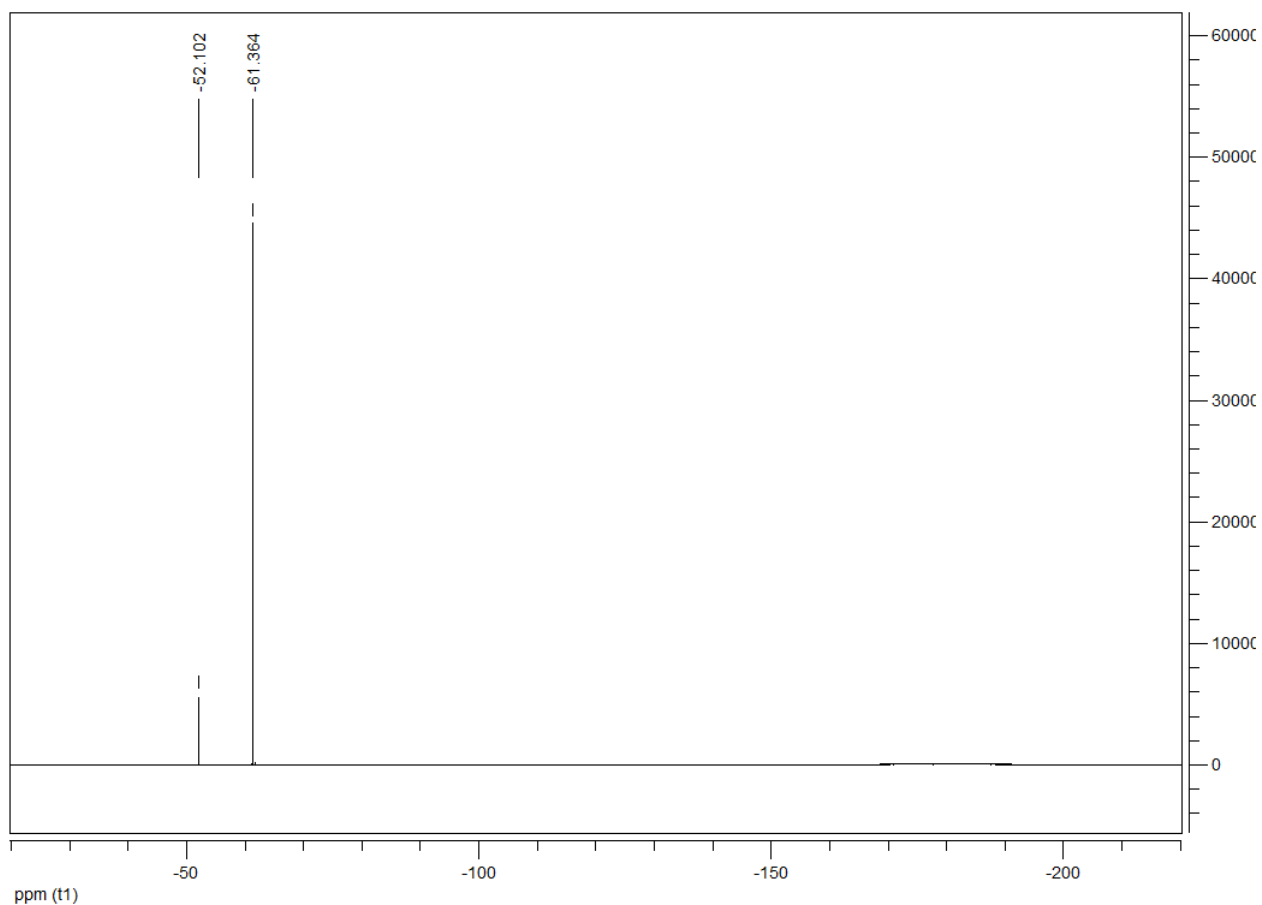

<sup>1</sup>H, <sup>13</sup>C and <sup>19</sup>F NMR spectra of compound **12** (DMSO-d<sub>6</sub>),  
**4-((6-amino-9H-purin-9-yl)methyl)-N-(3-(4-methyl-1H-imidazol-1-yl)-5-(trifluoromethyl)phenyl)benzamide:**

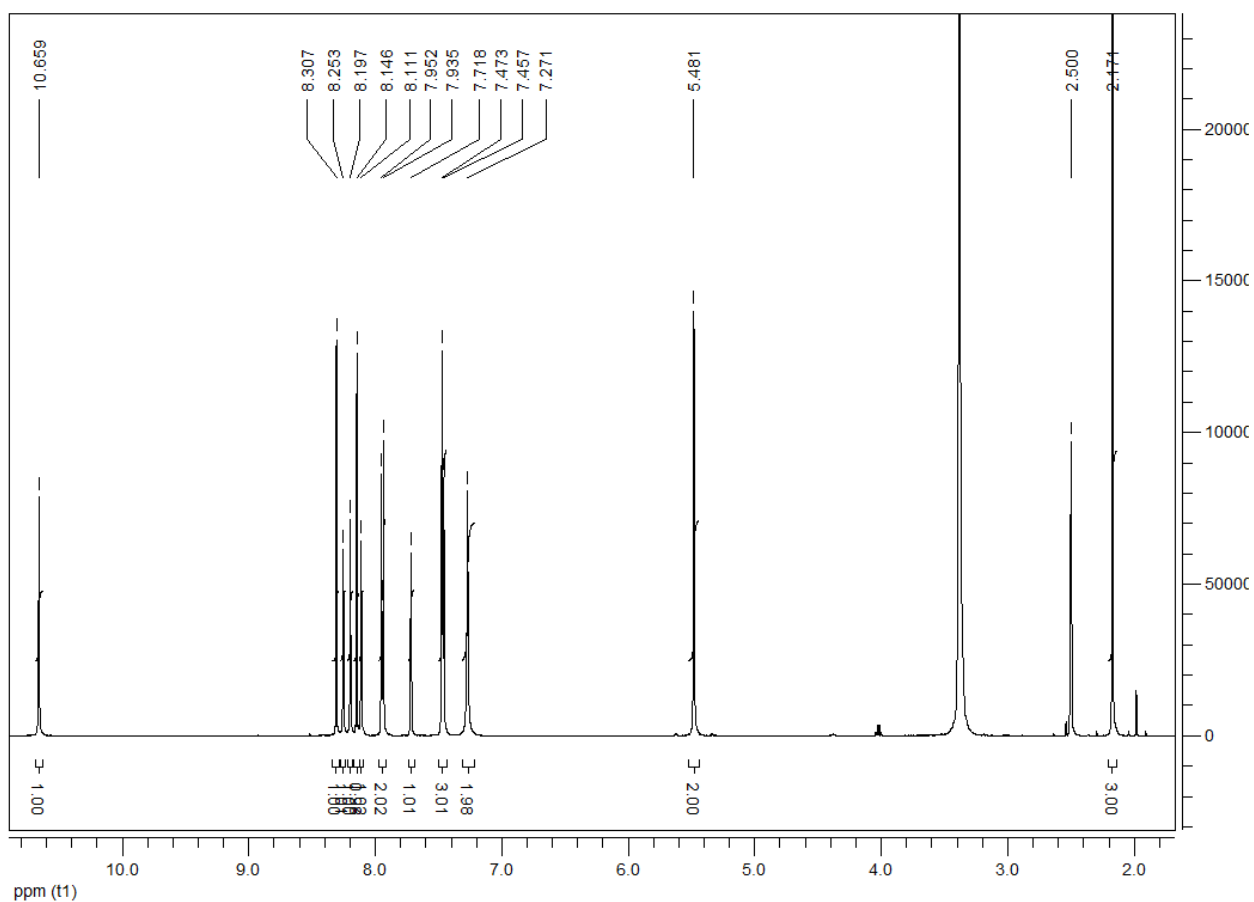

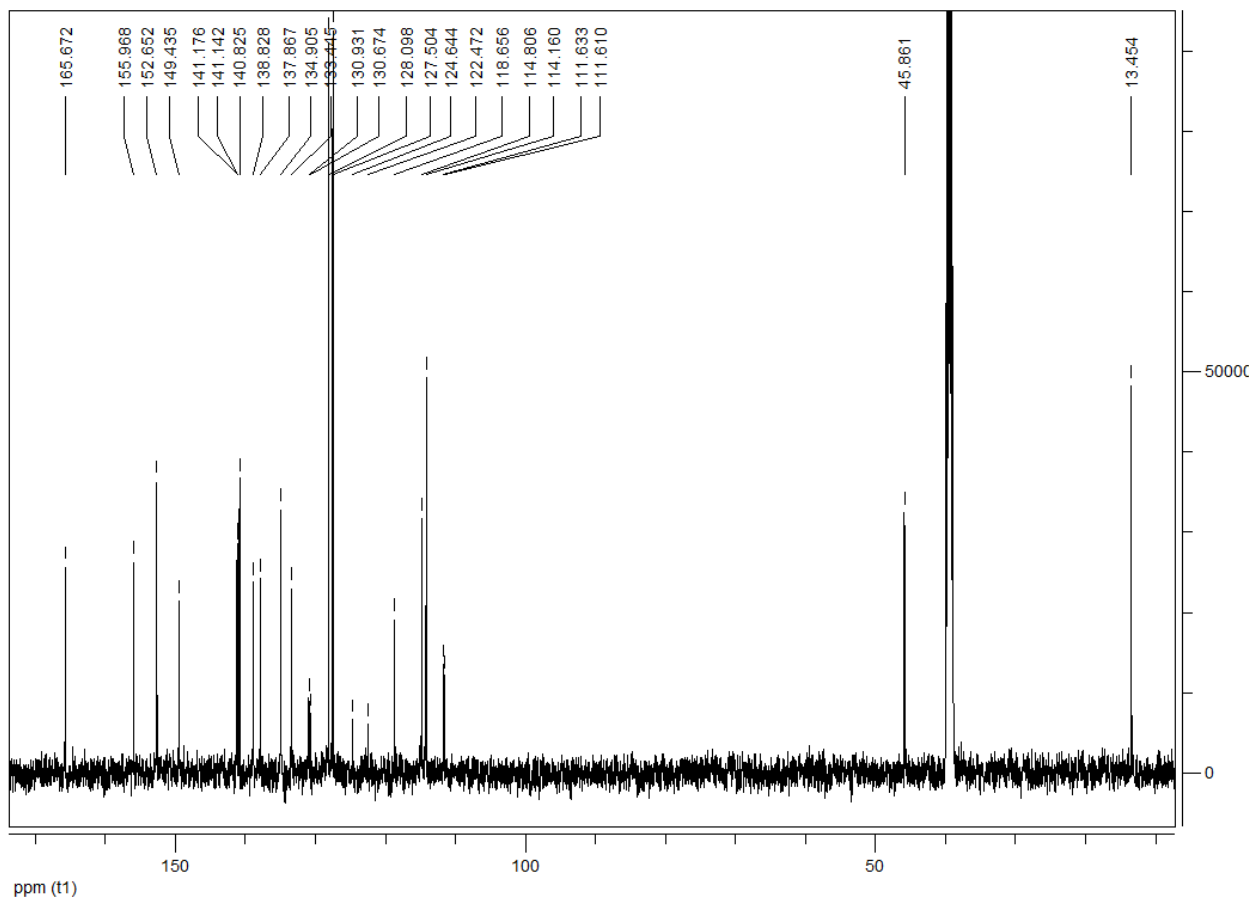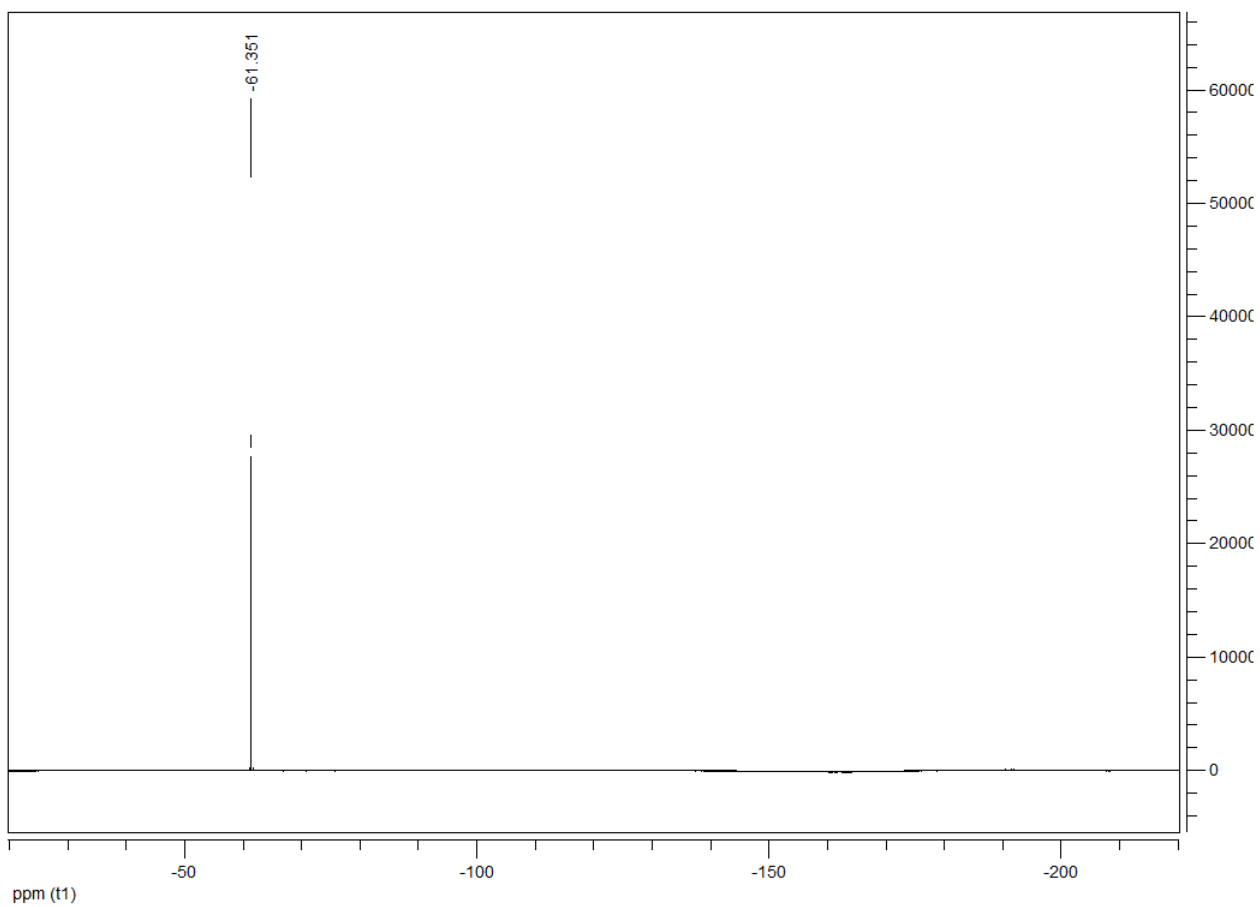

$^1\text{H}$ ,  $^{13}\text{C}$  and  $^{19}\text{F}$  NMR spectra of compound **13** (DMSO- $d_6$ ),  
**4-((2-chloro-6-methoxy-9H-purin-9-yl)methyl)-N-(3-(trifluoromethyl)phenyl)benzamide**:

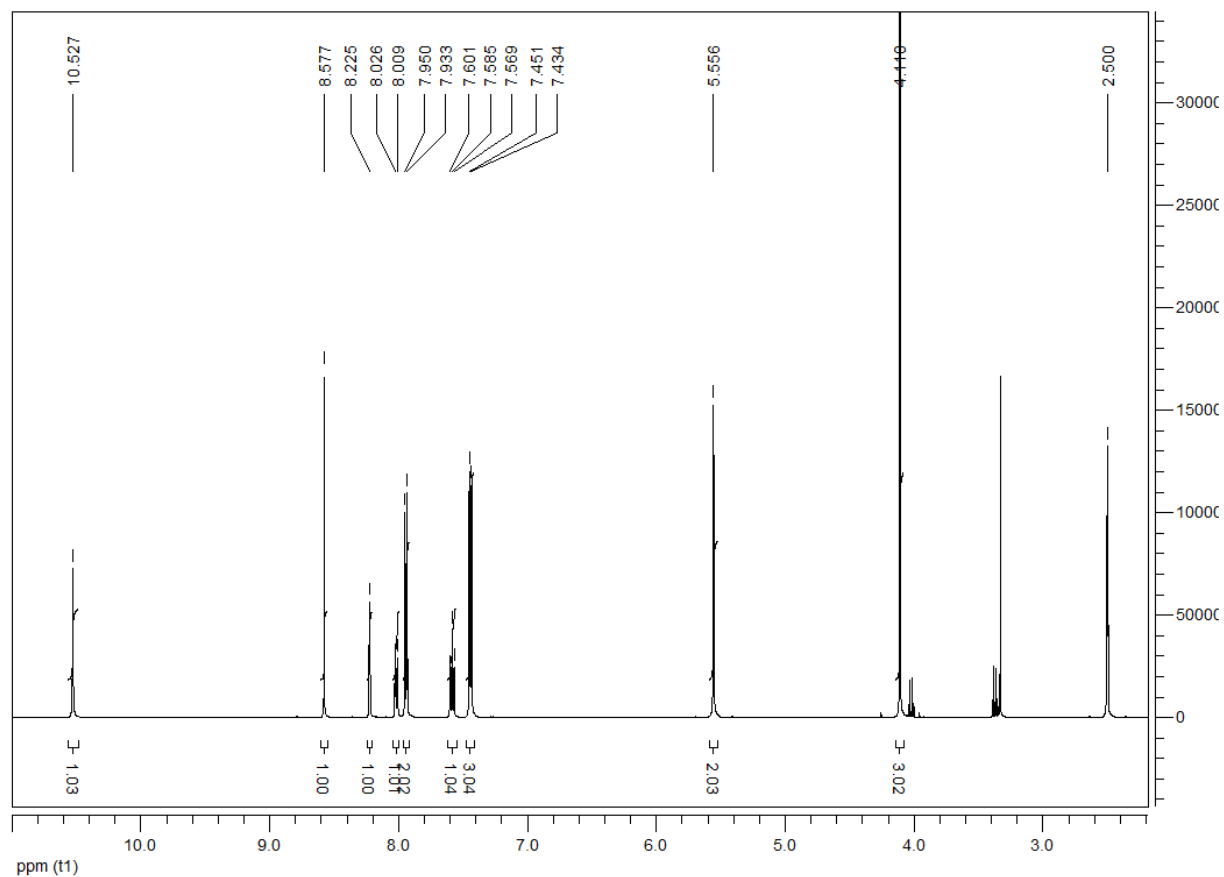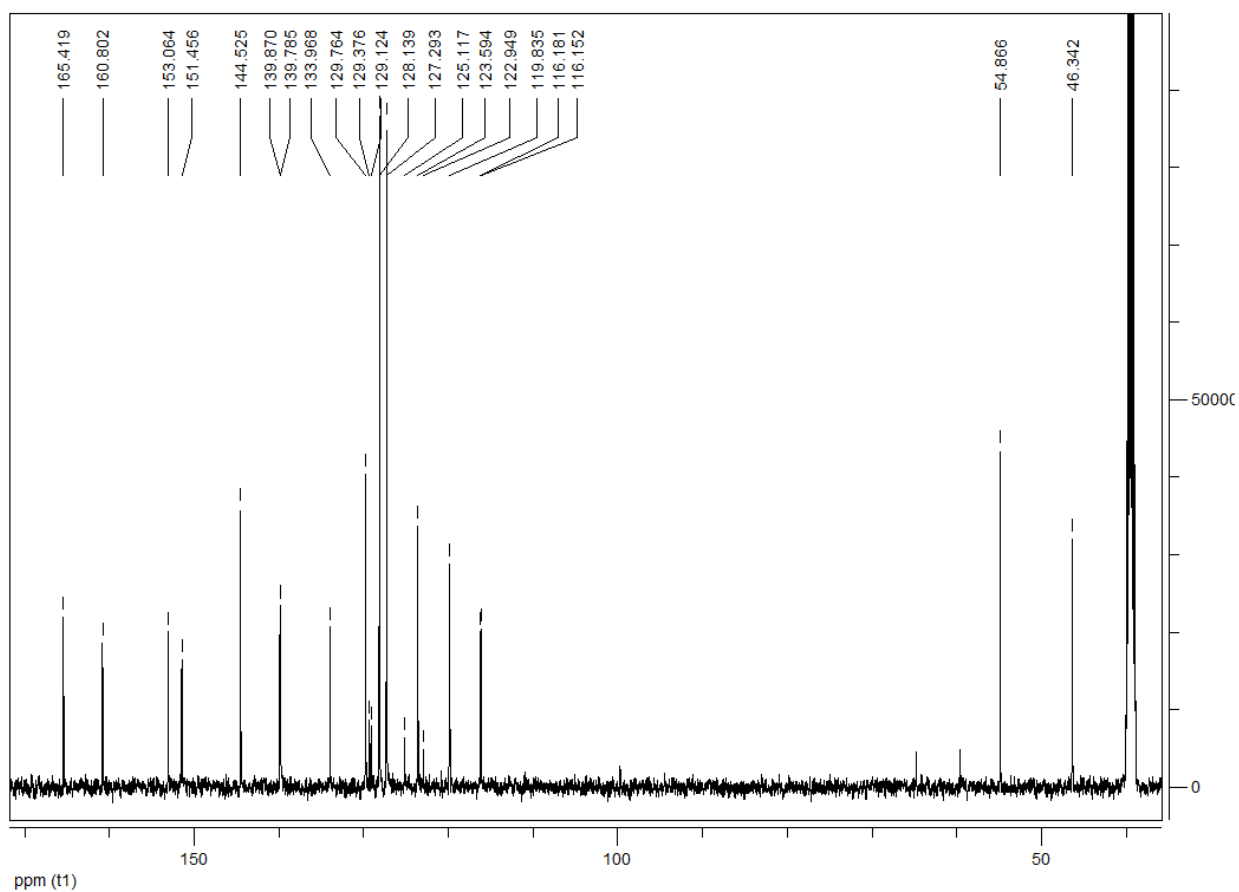

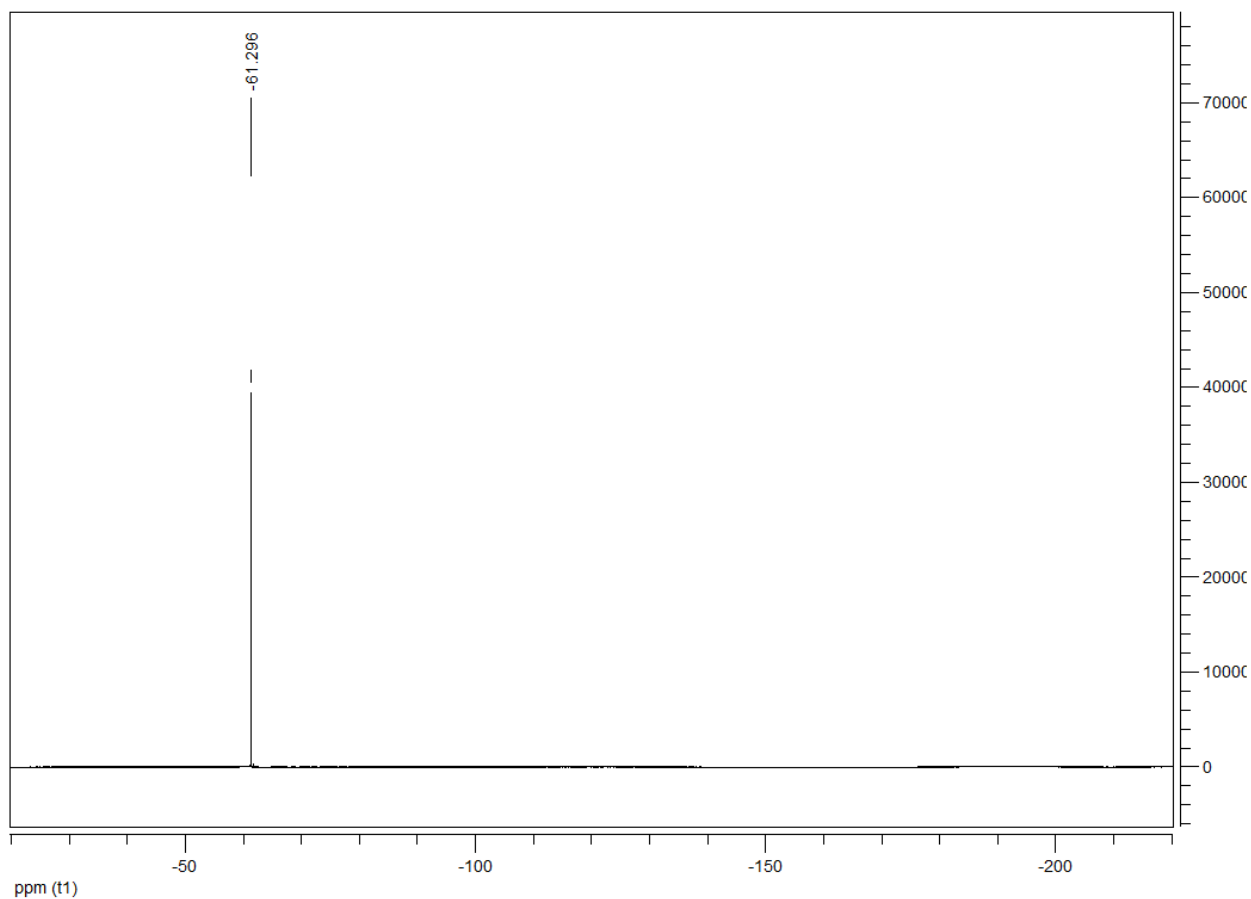

<sup>1</sup>H, <sup>13</sup>C and <sup>19</sup>F NMR spectra of compound 14 (DMSO-d<sub>6</sub>),  
**4-((2-chloro-6-methoxy-9H-purin-9-yl)methyl)-N-(3-(4-methyl-1H-imidazol-1-yl)-5-(trifluoromethyl)phenyl)benzamide:**

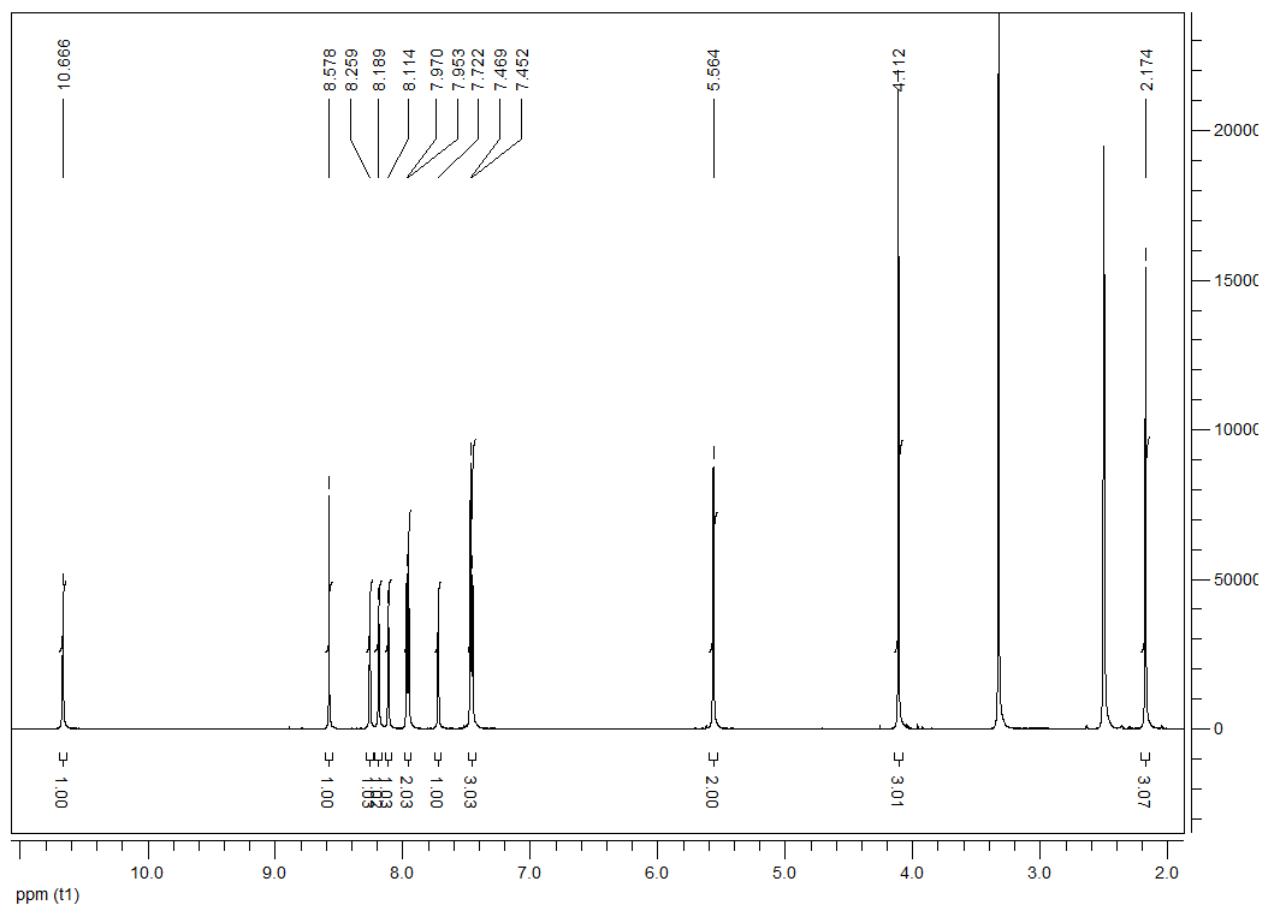

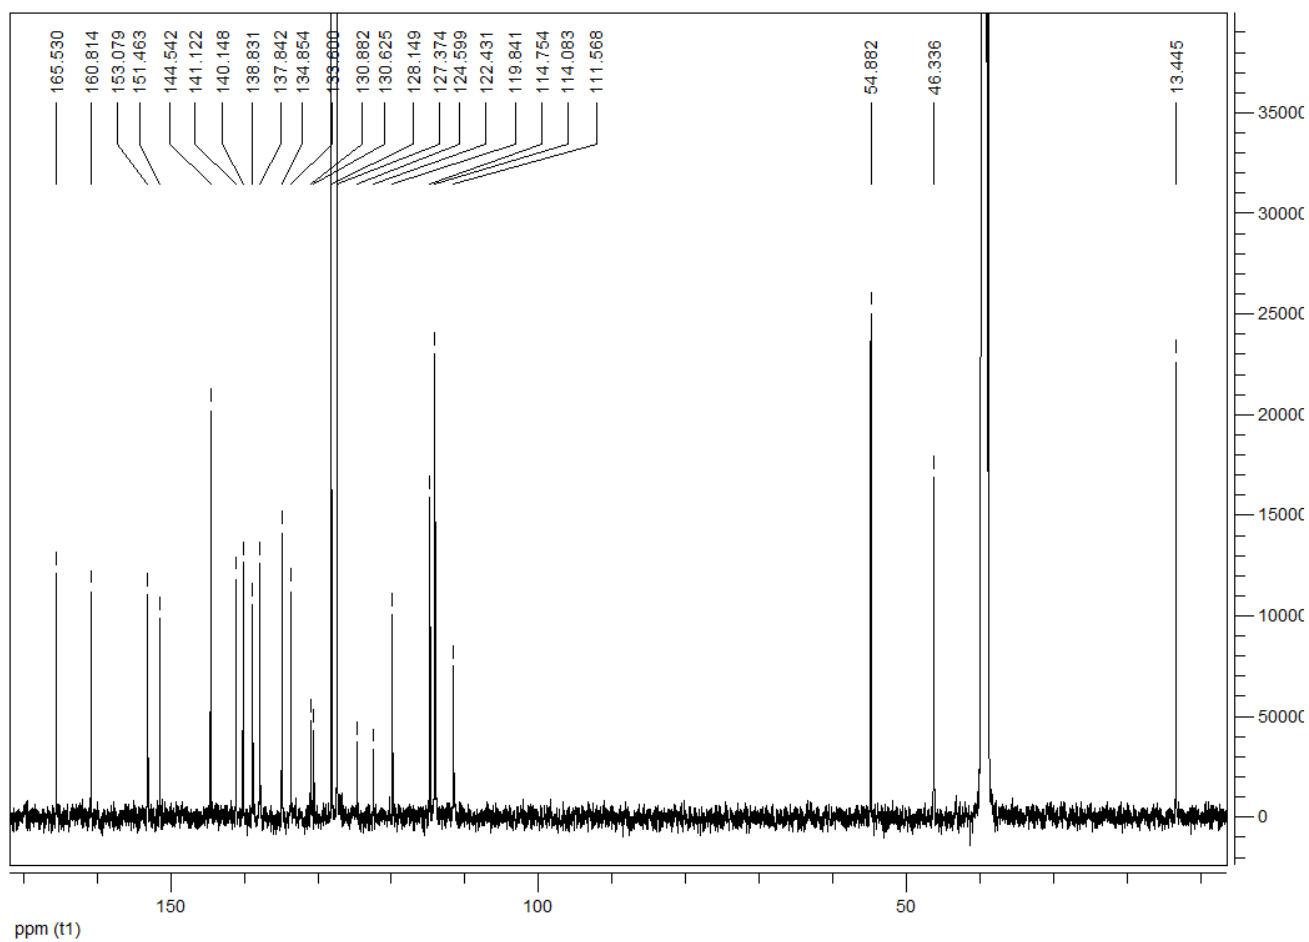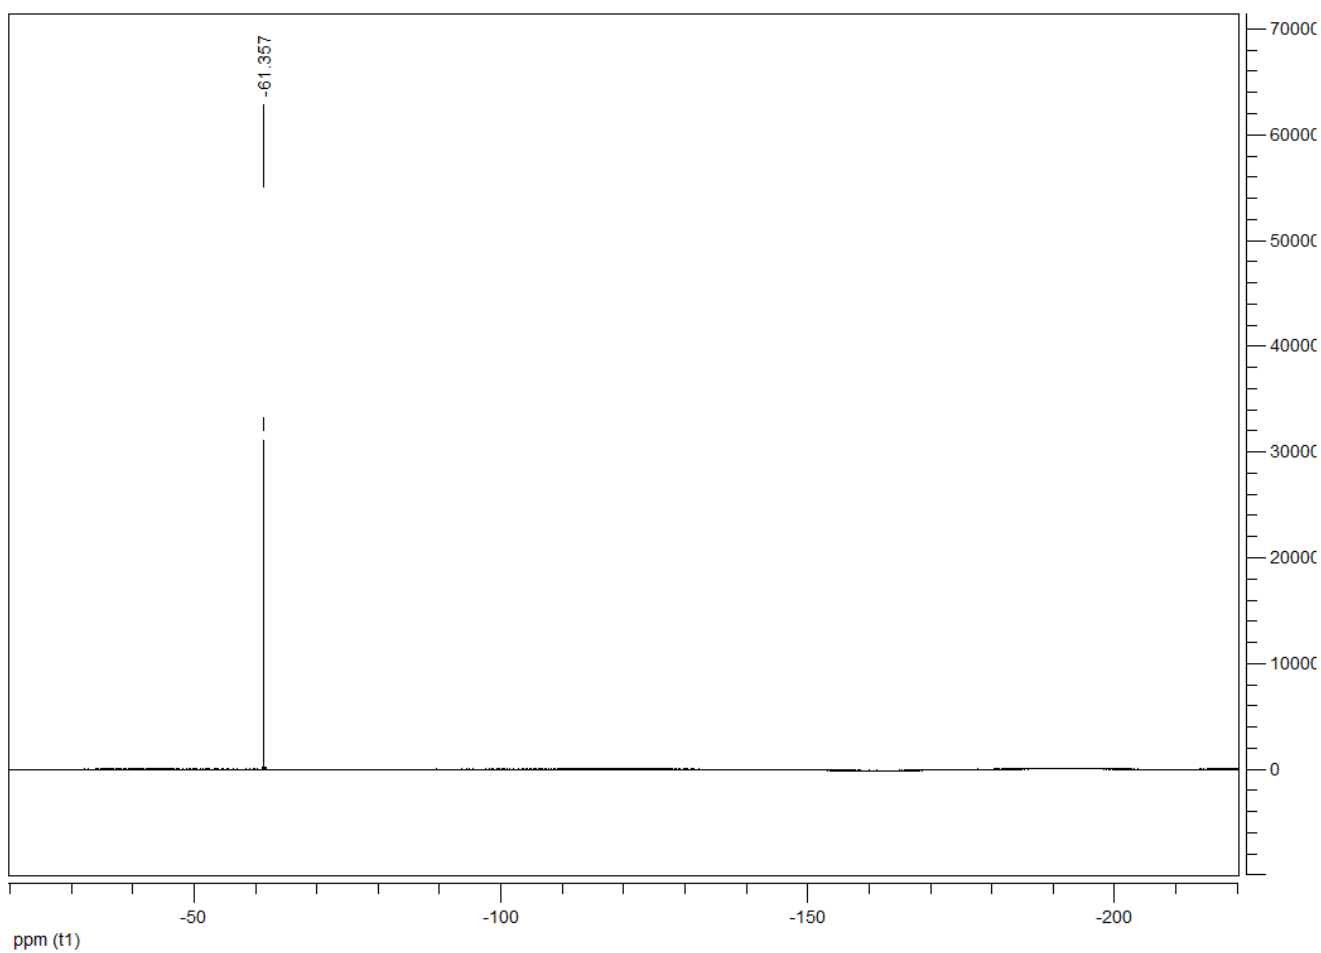

<sup>1</sup>H, <sup>13</sup>C and <sup>19</sup>F NMR spectra of compound **15** (DMSO-d<sub>6</sub>),  
**4-((6-amino-2-chloro-9H-purin-9-yl)methyl)-N-(3-(trifluoromethyl)phenyl)benzamide:**

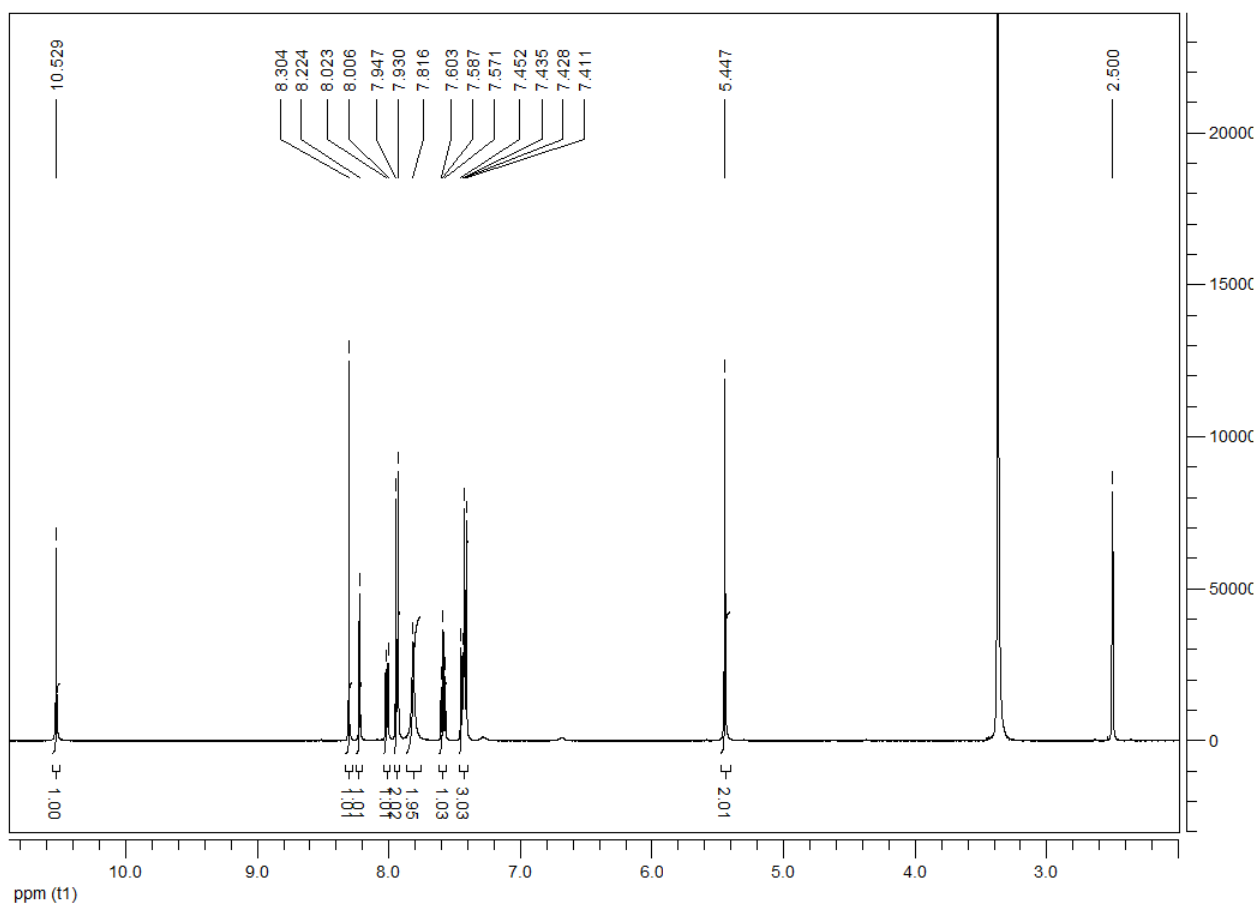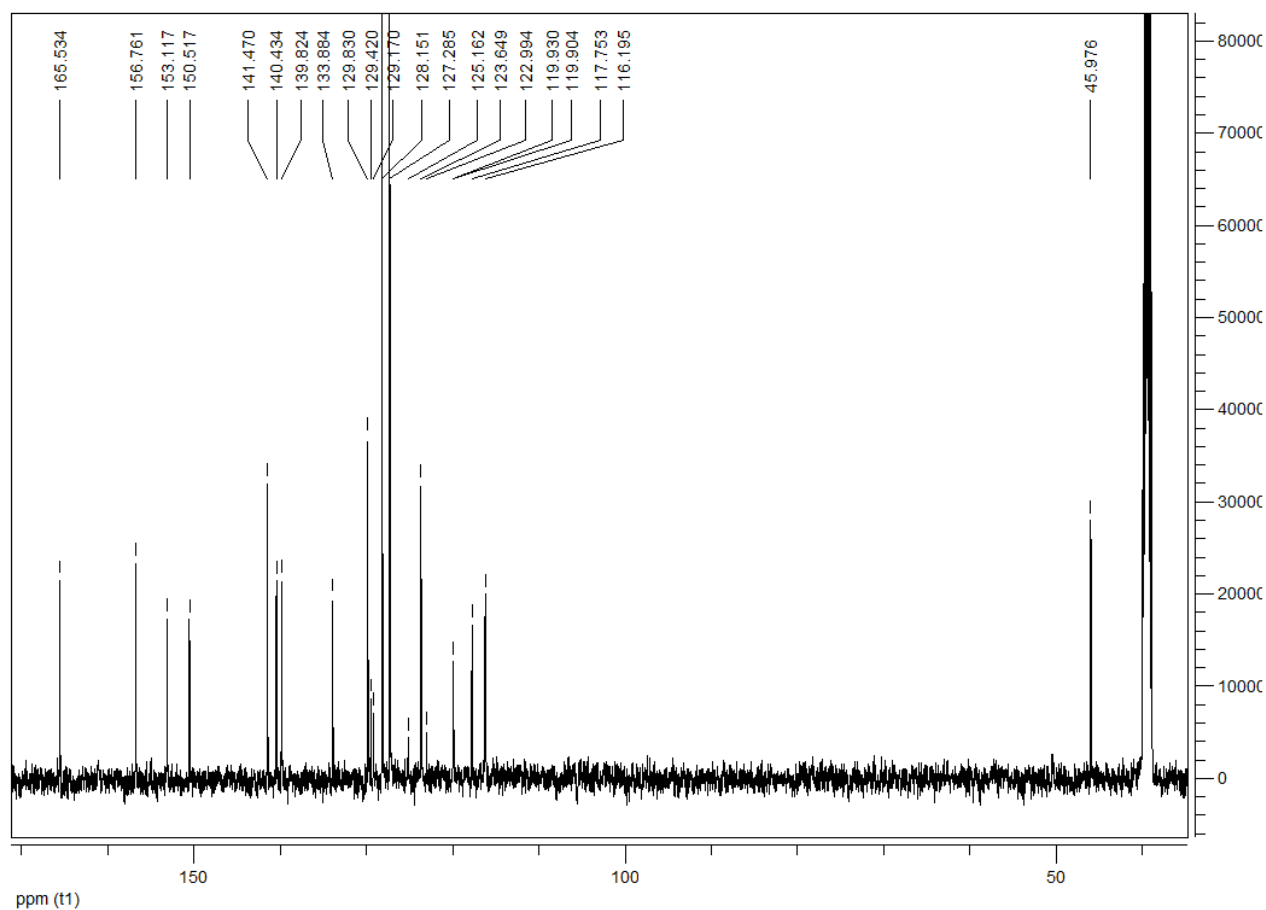

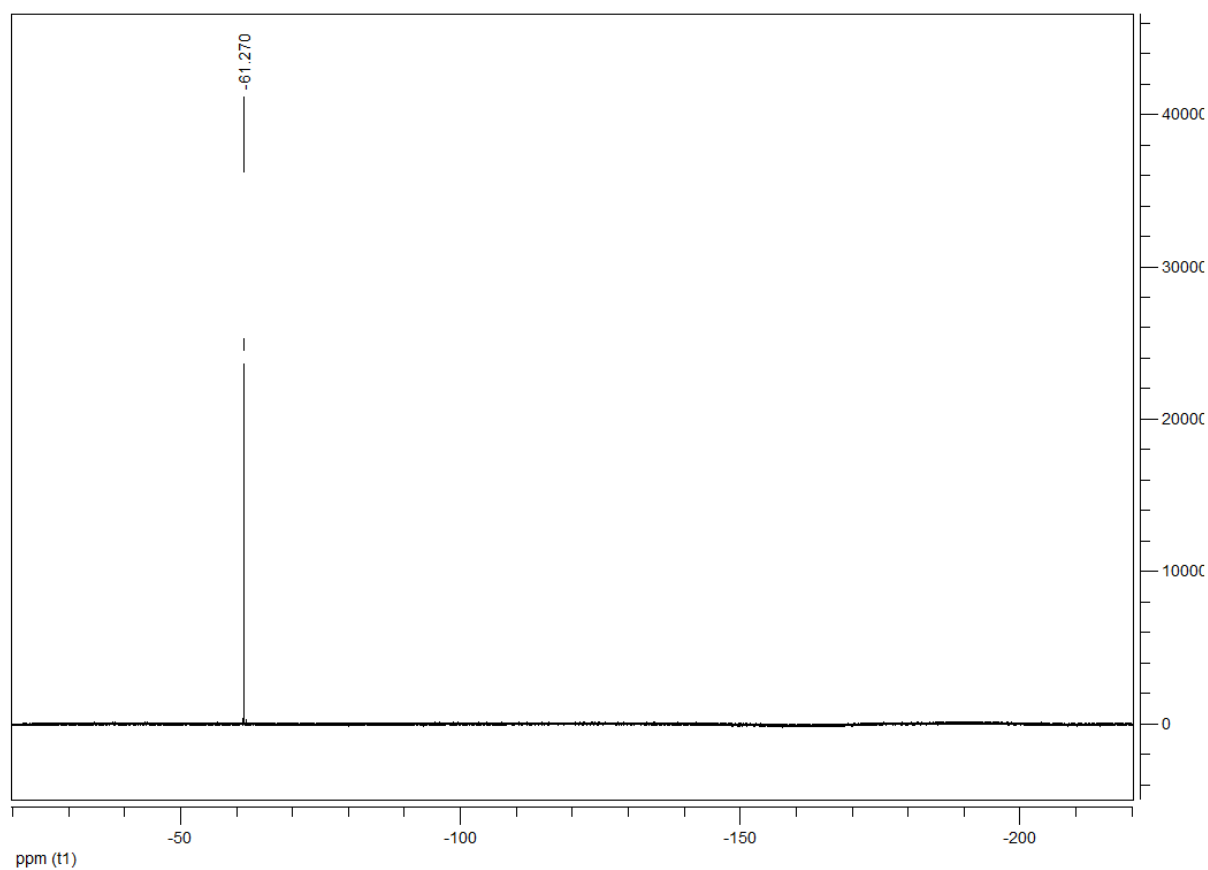

<sup>1</sup>H, <sup>13</sup>C and <sup>19</sup>F NMR spectra of compound **16** (DMSO-d<sub>6</sub>),  
**4-((6-amino-2-chloro-9H-purin-9-yl)methyl)-N-(3-(4-methyl-1H-imidazol-1-yl)-5-(trifluoromethyl)phenyl)benzamide:**

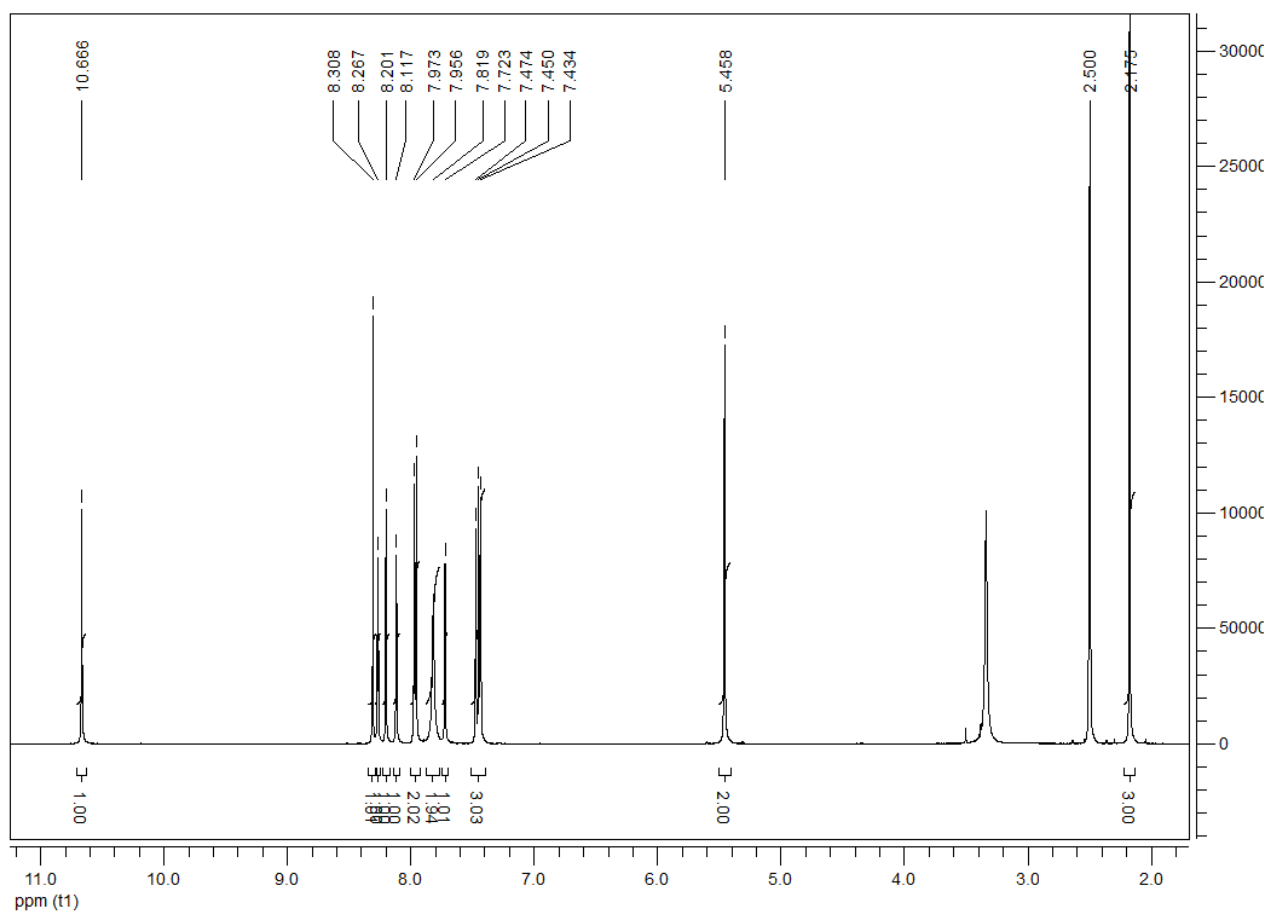

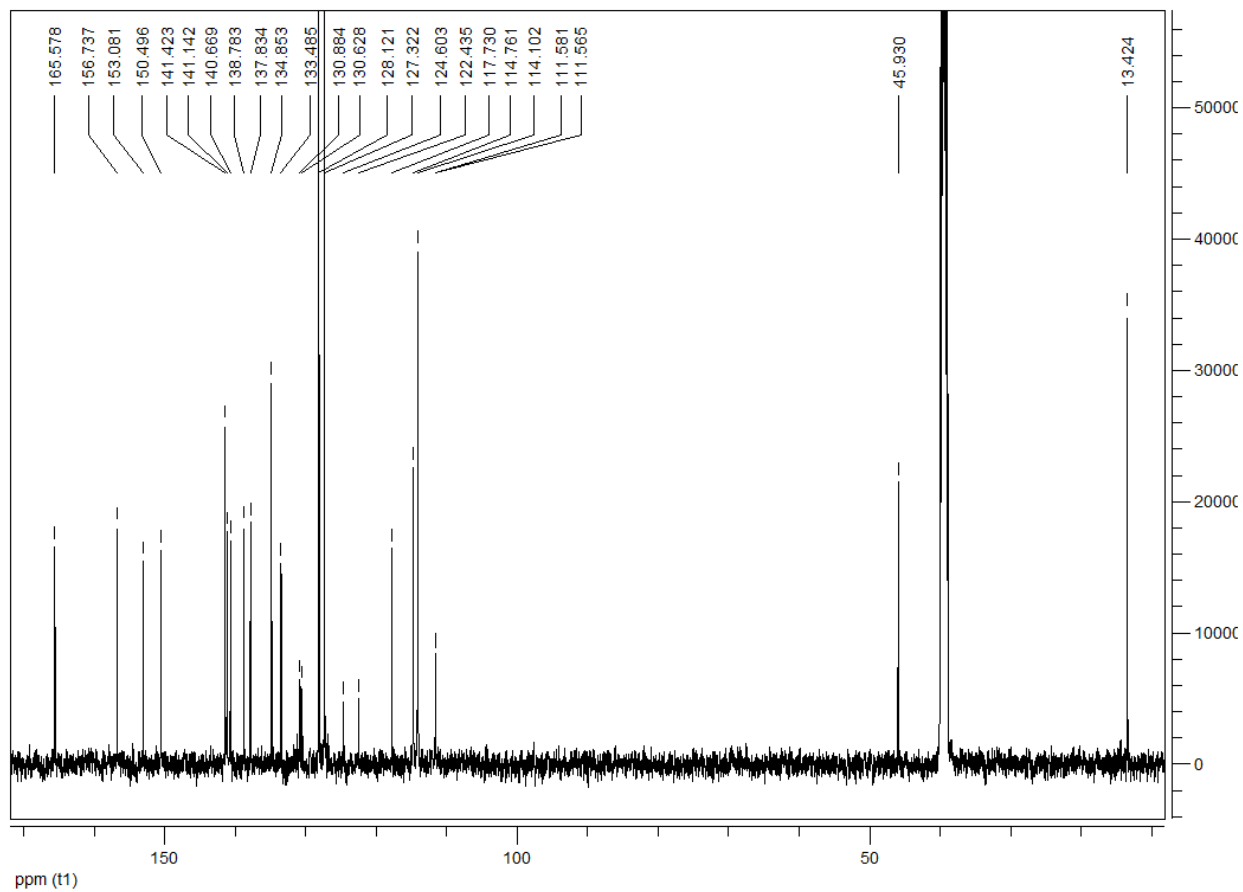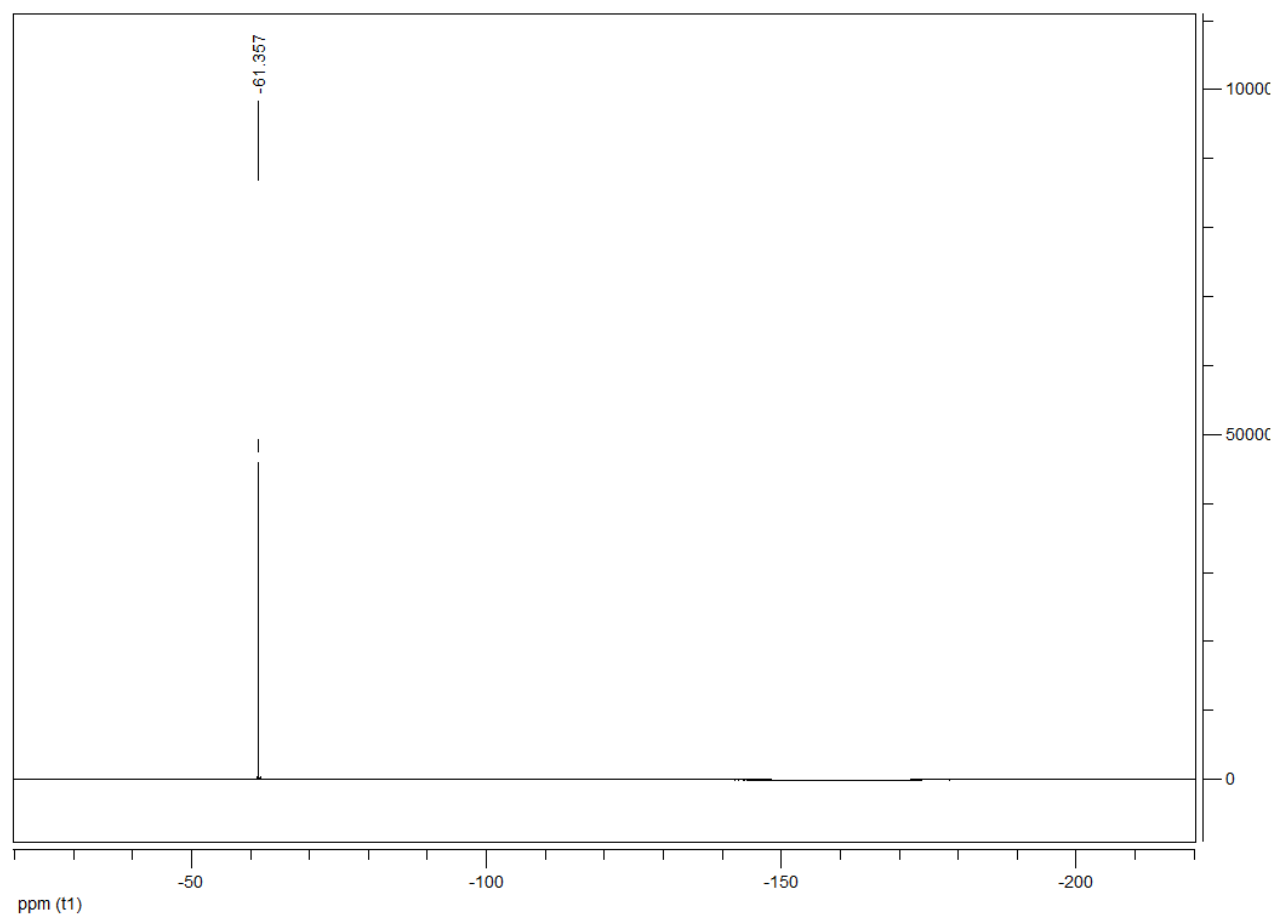

Supplement: s1 [file s1]
